# Supplementary material for: Antifungal Activity of Ginger Rhizome Extract against Fusarium solani
Source: MDPI journal article supplement (doi:10.3390/horticulturae8110983), 2022-10-22
Supplement: s1 [file s1]

Archive with 2 entries (2 files):
- supplementary materials.pdf
- Table S1 Chemical components and their content in GRE and classification of them(1).xlsx
