# Supplementary material for: Antifungal Activity of Ginger Rhizome Extract against Fusarium solani
Source: MDPI journal article supplement (doi:10.3390/horticulturae8110983), 2022-10-22
Supplement: s1 [file s1 › supplementary materials.pdf]

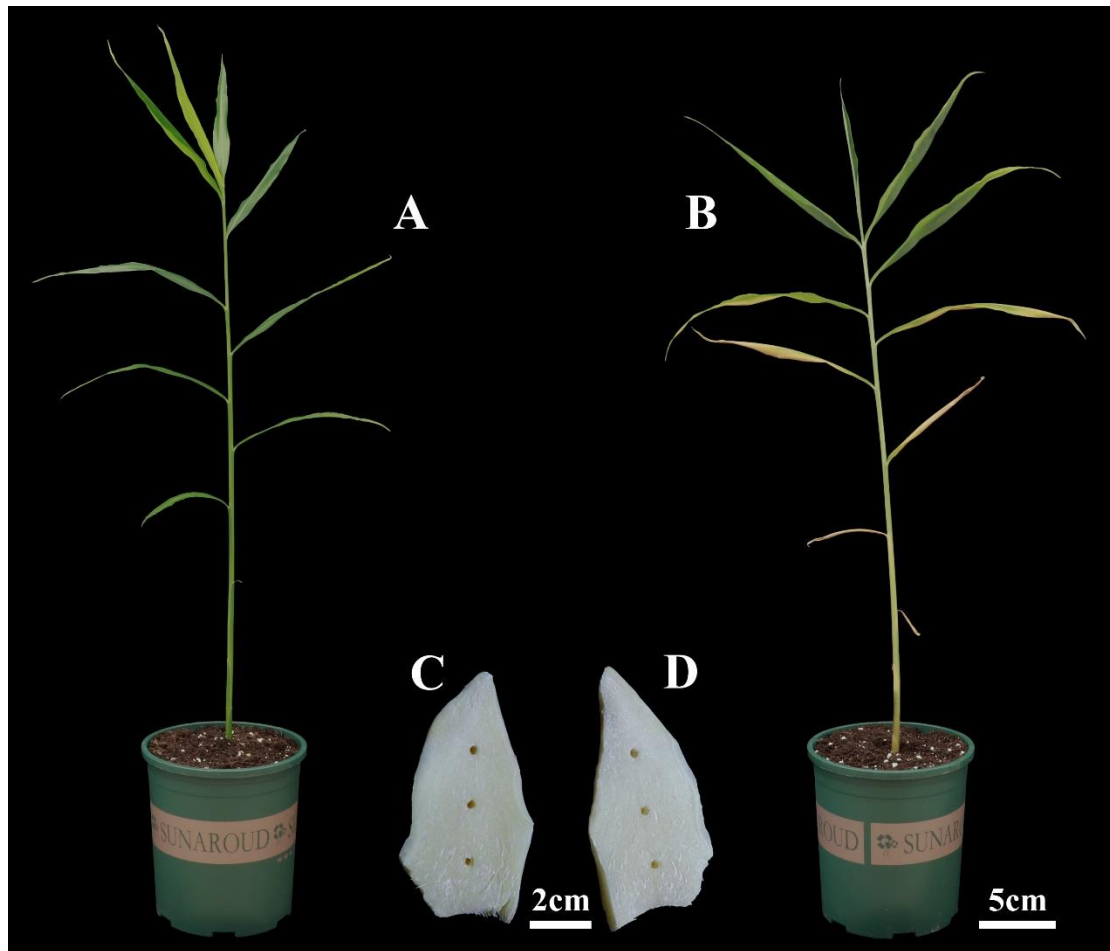

**Figure S1.** Morphologic changes of ginger aboveground (A) Control, treatment with distilled water; (B) Infection with *F. solani* for 30 days; and rhizome (C) Control, treatment with distilled water; (D) Infection with *F. solani* for 7 days.

**Table S2.** Morbidity of ginger plants and rhizomes inoculated by *F. solani* for 30 days and 7 days, respectively.

| Treatments                 | disease index (%) |
|----------------------------|-------------------|
| Inoculate at the stem base | 70.12             |
| Inoculate at the rhizome   | 0                 |

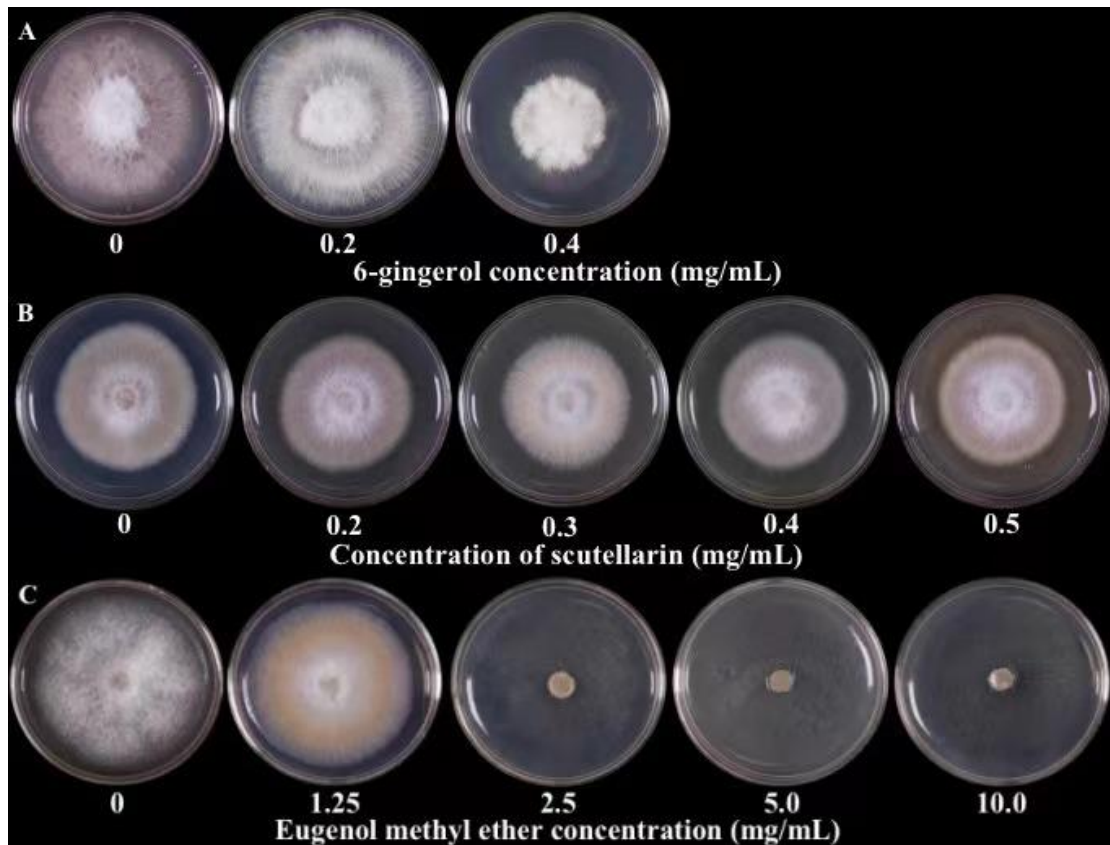

**Figure S2.** Effects of different concentrations of 6-gingerol on *F. solani* growth(A). Effects of different concentrations of scutellarin on *F. solani* growth(B). Effects of different concentrations of Eugenol methyl ether on *F. solani* growth(C).

**Table S3.** The concentrations of 4-hydroxybenzaldehyde, quercetin, [6]-Gingerol, Scutellarein (5,6,7,4'-Tetrahydroxyflavone) and Methyleugenol in the rhizome and aboveground.

| Compounds                                   | Formula                                        | Class          | Underground-Content | Aboveground-Content |
|---------------------------------------------|------------------------------------------------|----------------|---------------------|---------------------|
| 4-Hydroxybenzaldehyde                       | C <sub>7</sub> H <sub>6</sub> O <sub>2</sub>   | Phenolic acids | 4.1889%             | 0.7593%             |
| Quercetin                                   | C <sub>15</sub> H <sub>10</sub> O <sub>7</sub> | Flavonols      | 0.0863%             | 0.000001029%        |
| [6]-Gingerol                                | C <sub>17</sub> H <sub>26</sub> O <sub>4</sub> | Phenolic acids | 1.0513%             | 0.0425%             |
| Scutellarein (5,6,7,4'-Tetrahydroxyflavone) | C <sub>15</sub> H <sub>10</sub> O <sub>6</sub> | Flavonoid      | 0.6354%             | 0.0497%             |
| Methyleugenol                               | C <sub>11</sub> H <sub>14</sub> O <sub>2</sub> | Phenolic acids | 0.0133%             | 0.0018%             |
