# Supplementary material for: Antifungal Activity of Ginger Rhizome Extract against Fusarium solani
Source: MDPI journal article supplement (doi:10.3390/horticulturae8110983), 2022-10-22
Supplement: s1 [file s1 › Table S1 Chemical components and their content in GRE and classification of them(1).xlsx]

## Sheet: The chemical components of GRE
Index	Q1 (Da)	Q3 (Da)	Molecular Weight (Da)	Formula	Ionization model	Compounds	Class I	Class II	CAS	Level	Underground-part1	Underground-part2	Underground-part3	Ud-Content
pmp001198	132.1	57.1	131.095	C6H13NO2	[M+H]+	6-Deoxyfagomine	Alkaloids	Alkaloids	197449-09-5	A	59018000	58252000	57973000	0.0753626
Lmgp000796	150.06	61.01	149.048	C8H7NO2	[M+H]+	4-Hydroxymandelonitrile	Alkaloids	Alkaloids	13093-65-7	B	44426000	45013000	45847000	0.0581797
mws0628	121.03	92	122.037	C7H6O2	[M-H]-	4-Hydroxybenzaldehyde	Phenolic acids	Phenolic acids	123-08-0	A	32261000	31545000	33605000	0.0418892
Wmhn001652	203.08	116.05	204.042	C11H8O4	[M-H]-	3-Methoxy-juglone	Quinones	Quinones	-	B	30215000	30978000	30261000	0.0393312
Hmsp006240	293.17	137.06	292.167	C17H24O4	[M+H]+	[6]-Gingerdione	Phenolic acids	Phenolic acids	61871-71-4	A	27962000	27515000	27353000	0.0356207
Hmsp007523	319.22	191.1	318.219	C20H30O3	[M+H]+	Methyl-[8]-Shogaol	Phenolic acids	Phenolic acids	863780-79-4	A	27788000	26298000	25532000	0.0342386
Hmsp007678	507.27	137.06	506.288	C28H42O8	[M+H]+	Methyl-diacetoxy-[8]-gingerdiol	Phenolic acids	Phenolic acids	-	A	24408000	24920000	26022000	0.032404
mws1561	349.24	56.9	350.246	C21H34O4	[M-H]-	[10]-Gingerol	Phenolic acids	Phenolic acids	23513-15-7	A	24285000	23165000	22880000	0.0302444
Hmpp002596	391.17	137.05	390.168	C21H26O7	[M+H]+	5'-Hydroxyhexahydrocurcumin	Others	Others	-	A	23143000	22938000	23230000	0.0298067
Hmyp009454	221.19	119.08	220.182	C15H24O	[M+H]+	Nootkatol	Terpenoids	Sesquiterpenoids	50763-67-2	B	22132000	22316000	22670000	0.028864
mws1686	167.07	121	166.063	C9H10O3	[M+H]+	Paeonol	Phenolic acids	Phenolic acids	552-41-0	B	19982000	20016000	20656000	0.0260838
Hmjp004041	371.15	177.05	370.141	C21H22O6	[M+H]+	Dihydrocurcumin	Others	Others	76474-56-1	B	18320000	19247000	18849000	0.024263
Hmsp006419	279.19	137.06	278.188	C17H26O3	[M+H]+	[6]-Paradol	Phenolic acids	Phenolic acids	27113-22-0	A	16295000	16252000	16437000	0.0210654
Hmsp008976	361.27	177.09	360.266	C23H36O3	[M+H]+	[12]-Shogaol	Phenolic acids	Phenolic acids	99742-10-6	B	15771000	15633000	15861000	0.020326
Hmpn003185	403.18	179.07	404.184	C22H28O7	[M-H]-	5-Hydroxy-1-(4-hydroxy-3,5-dimethoxyphenyl)-7-(4-hydroxy-3-methoxyphenyl)heptan-3-one	Others	Others	-	B	15189000	15463000	14790000	0.0195431
Hmdp001950	303.12	285.12	302.115	C17H18O5	[M+H]+	2',7-Dihydroxy-3',4'-dimethoxyisoflavan	Flavonoids	Isoflavones	52250-35-8	B	14603000	14812000	15947000	0.0195073
Hmsp007106	335.26	151.07	334.251	C21H34O3	[M+H]+	[10]-Paradol	Phenolic acids	Phenolic acids	36700-48-8	A	14550000	15078000	15464000	0.0193921
Hmsp007962	333.24	177.09	332.235	C21H32O3	[M+H]+	[10]-Shogaol	Phenolic acids	Phenolic acids	36752-54-2	A	14314000	14267000	13782000	0.0182185
mws0133	123.06	80.05	122.048	C6H6N2O	[M+H]+	Nicotinamide	Others	Others	98-92-0	A	13627000	13693000	14263000	0.0178824
pmn001517	329.12	167	330.131	C15H22O8	[M-H]-	3,4,5-Trimethoxyphenyl-1-O-Glucoside	Phenolic acids	Phenolic acids	-	B	13793000	12894000	14493000	0.0177072
Hmpn002947	405.19	390.16	406.199	C22H30O7	[M-H]-	3,5-Dihydroxy-meodah	Others	Others	145888-84-2	A	12307000	13088000	12709000	0.0163878
Zmbp002538	205.1	146.06	204.09	C11H12N2O2	[M+H]+	1-Methoxy-indole-3-acetamide	Alkaloids	Alkaloids	-	A	11400000	11029000	11414000	0.0145535
pme1439	165.05	119	164.047	C9H8O3	[M+H]+	p-Coumaric acid	Phenolic acids	Phenolic acids	501-98-4	A	11135000	11090000	11222000	0.0143837
pmb0484	104.1	60.1	103.091	C5H13NO	[M+H]+	Choline	Alkaloids	Alkaloids	62-49-7	B	9954200	9913000	9976700	0.0128343
Hmsp007050	353.23	151.07	352.189	C19H28O6	[M+H]+	[4]-Gingerdiol	Phenolic acids	Phenolic acids	863780-88-5	A	10695000	8678000	8384700	0.0119352
Hmpn002991	375.18	135.04	376.189	C21H28O6	[M-H]-	1,7-Bis(4-hydroxy-3-methoxyphenyl)heptane-3,5-diol	Phenolic acids	Phenolic acids	-	A	9757300	9271200	8595000	0.0118795
Hmpp003343	355.15	137.05	354.147	C21H22O5	[M+H]+	1,7-Bis(4-Hydroxy-3-Methoxyphenyl)Hepta-4,6-Dien-3-One	Phenolic acids	Phenolic acids	-	B	8208900	8410700	7915800	0.0105521
mws1560	293.18	99.1	294.183	C17H26O4	[M-H]-	[6]-Gingerol	Phenolic acids	Phenolic acids	23513-14-6	A	7930900	8050700	8465200	0.0105132
pmp001230	279.16	121	278.152	C16H22O4	[M+H]+	Senkyunolide M	Others	Others	146986-60-9	A	8223200	8061400	8124800	0.010497
Hmsp005892	249.14	137.06	248.141	C15H20O3	[M+H]+	[4]-Shogaol	Phenolic acids	Phenolic acids	-	A	8012600	7677900	7740300	0.010076
Hmsp006266	291.2	177.06	290.188	C18H26O3	[M+H]+	Methyl-[6]-Shogaol	Phenolic acids	Phenolic acids	-	A	7750800	7761000	7445400	0.009873
mws0851	143.11	143.11	166.097	C8H15NaO2	[M-Na]-	Sodium Valproate	Others	Others	1069-66-5	B	7522100	7267500	7428000	0.00955427
Hmsn002272	327.11	165.05	328.116	C15H20O8	[M-H]-	Demethyl coniferin	Phenolic acids	Phenolic acids	-	B	7128300	6899400	6595800	0.00886911
Hmpn003066	469.12	165.05	470.125	C21H26O10S	[M-H]-	1,7-Bis(3,4-dihydroxy-5-methoxyphenyl)-5-oxoheptane-3-sulfonic acid	Others	Others	-	B	6567300	6468100	6772800	0.00851817
Hmjp003948	341.14	177.05	340.131	C20H20O5	[M+H]+	Dihydrodemethoxy curcumin	Others	Others	-	B	5903300	5966100	6002600	0.00768589
pme1383	170.08	134.1	169.074	C8H11NO3	[M+H]+	Pyridoxine	Others	Others	65-23-6	A	5609400	6447300	5499200	0.00755157
pmn001706	471.35	471.35	472.355	C30H48O4	[M-H]-	2-Hydroxyoleanolic acid	Terpenoids	Triterpene	26707-60-8	B	5736600	5656400	5446500	0.0072419
Lmzn006284	471.35	471.35	472.355	C30H48O4	[M-H]-	2α-Hydroxyursolic acid	Terpenoids	Triterpene	-	B	5399300	5086700	4779400	0.00656477
Lmsp004632	287.06	269.04	286.048	C15H10O6	[M+H]+	Scutellarein (5,6,7,4'-Tetrahydroxyflavone)	Flavonoids	Flavonoid	529-53-3	B	4883000	4938800	4952600	0.00635378
mws1080	341.11	179	342.116	C12H22O11	[M-H]-	Galactinol	Others	Others	3687-64-7	A	4765400	4961100	4830000	0.00626034
Hmsp004517	267.15	137.06	266.152	C15H22O4	[M+H]+	[4]-Gingerol	Phenolic acids	Phenolic acids	77398-90-4	A	4285500	4497500	4694000	0.00579586
pmp001224	357.13	147	356.126	C20H20O6	[M+H]+	Brosimacutin G	Flavonoids	Chalcones	350221-50-0	B	4523800	4285500	4485600	0.00571705
Hmqn000843	301.09	123.01	302.1	C13H18O8	[M-H]-	Tachioside	Lignans and Coumarins	Lignans	109194-60-7	B	4279200	4212200	4317600	0.00550835
pme0281	165.02	121.03	166.027	C8H6O4	[M-H]-	Terephthalic acid	Phenolic acids	Phenolic acids	100-21-0	A	3891800	3951000	3754900	0.00498781
pmb0764	144.05	113.2	143.04	C6H9NOS	[M+H]+	4-Methyl-5-thiazoleethanol	Others	Others	137-00-8	A	3786100	3721100	3836700	0.00487828
mws0028	167.03	108.02	168.042	C8H8O4	[M-H]-	Vanillic acid	Phenolic acids	Phenolic acids	121-34-6	A	3822000	3618300	3617700	0.00475527
Hmsp007306	307.21	151.07	306.219	C19H30O3	[M+H]+	[8]-Paradol	Phenolic acids	Phenolic acids	27113-23-1	A	3771500	3641300	3605600	0.00473834
pmp001285	149.02	65.04	148.016	C8H4O3	[M+H]+	Phthalic anhydride	Phenolic acids	Phenolic acids	85-44-9	A	3403100	3331000	3379200	0.00434911
Hmcp003783	211.09	193.07	210.079	C13H10N2O	[M+H]+	1-Acetyl-β-carboline	Alkaloids	Alkaloids	-	A	3404500	3146400	3346400	0.00425589
pmp000452	225.15	85	224.141	C13H20O3	[M+H]+	Annuionone D	Others	Others	-	B	3166700	3265600	3111300	0.00410445
mws0749	137.02	93	138.032	C7H6O3	[M-H]-	4-Hydroxybenzoic acid	Phenolic acids	Phenolic acids	99-96-7	B	2994300	3050000	3035300	0.00390475
Hmsp007613	321.2	137.06	320.199	C19H28O4	[M+H]+	[8]-Gingerdione	Phenolic acids	Phenolic acids	77334-06-6	A	3024300	2918600	2915800	0.00380957
pmp001287	120.08	103.05	119.073	C8H9N	[M+H]+	N-Benzylmethylene isomethylamine	Alkaloids	Alkaloids	-	A	2825300	2890200	2866800	0.00369091
Hmpn003163	343.16	179.07	344.163	C20H24O5	[M-H]-	5-Hydroxy-1-(4-hydroxy-3-methoxyphenyl)-7-(4-hydroxyphenyl)heptan-3-one	Others	Others	-	B	2770900	2693200	2646800	0.00348804
mws4170	179.06	59.01	180.063	C6H12O6	[M-H]-	D-Glucose	Others	Others	14431-43-7	A	2759200	2693400	2617200	0.0034704
mws0097	357.13	151	358.142	C20H22O6	[M-H]-	Pinoresinol*	Lignans and Coumarins	Lignans	487-36-5	B	2697900	2502600	2670800	0.0033847
mws1559	321.21	127	322.214	C19H30O4	[M-H]-	8-Gingerol	Others	Others	23513-08-8	A	2612600	2590400	2519500	0.00332109
Hmpn003034	403.17	179.07	404.184	C22H28O7	[M-H]-	5-Hydroxy-7-(4-hydroxy-3,5-dimethoxyphenyl)-1-(4-hydroxy-3-methoxyphenyl)heptan-3-one	Others	Others	-	B	2434600	2562300	2544900	0.0032435
Lmdn004267	357.13	151.04	358.142	C20H22O6	[M-H]-	Epipinoresinol*	Lignans and Coumarins	Lignans	24404-50-0	B	2491500	2456300	2549600	0.00322414
pme0519	341.11	119.03	342.116	C12H22O11	[M-H]-	D-Sucrose	Others	Others	57-50-1	A	2459000	2329900	2475000	0.00312358
Hmpp002994	357.17	177.09	356.162	C21H24O5	[M+H]+	Gingerenone A	Others	Others	128700-97-0	A	2539300	2291300	2282200	0.00305859
pmb3107	359.1	182.1	360.106	C15H20O10	[M-H]-	Glucosyringic Acid	Phenolic acids	Phenolic acids	-	B	2283100	2215500	2326200	0.00293484
mws0458	151.04	136	152.047	C8H8O3	[M-H]-	Vanillin	Phenolic acids	Phenolic acids	121-33-5	A	2110300	2180300	2153000	0.00277117
mws0191	118.09	59	117.079	C5H11NO2	[M+H]+	Betaine	Alkaloids	Alkaloids	107-43-7	B	2184000	2019500	2084200	0.00270379
mws5038	341.11	89.02	342.116	C12H22O11	[M-H]-	Isomaltulose	Others	Others	13718-94-0	A	1823100	1832900	2504400	0.00264877
Hmgn001653	137.02	93.04	138.032	C7H6O3	[M-H]-	Protocatechualdehyde	Phenolic acids	Phenolic acids	139-85-5	B	2061400	1921500	2062000	0.00259934
pme2296	369.13	285	368.126	C21H20O6	[M+H]+	Curcumin	Others	Others	458-37-7	B	1870600	1899100	2062200	0.00250791
Lmlp012720	279.16	149.02	278.152	C16H22O4	[M+H]+	Dibutyl phthalate	Phenolic acids	Phenolic acids	84-74-2	A	1875900	1853100	1778100	0.00236836
Lmxp011770	279.16	149.02	278.152	C16H22O4	[M+H]+	Diisobutyl phthalate	Phenolic acids	Phenolic acids	84-69-5	A	1834800	1794700	1826000	0.00234607
Hmpn003232	373.17	179.07	374.173	C21H26O6	[M-H]-	5-Hydroxy-1,7-bis(4-hydroxy-3-methoxyphenyl)heptan-3-one	Others	Others	-	A	1669400	1792100	1680300	0.00221145
pmn001394	405.12	243.1	406.126	C20H22O9	[M-H]-	2,3,5,4'-Tetrahydroxystilbene-2-O-glucoside	Others	Stilbene	-	B	1696100	1944900	1499400	0.00221125
Hmsp006378	309.2	177.09	308.199	C18H28O4	[M+H]+	Methyl-[6]-gingerol	Phenolic acids	Phenolic acids	61914-52-1	A	1638600	1631500	1607200	0.00209749
mws0467	165.06	119.05	166.063	C9H10O3	[M-H]-	3-(4-Hydroxyphenyl)-propionic acid	Phenolic acids	Phenolic acids	501-97-3	B	1474200	1472700	1437500	0.00188554
Zmhn002227	385.11	223.06	386.121	C17H22O10	[M-H]-	4-O-Glucosyl-sinapate	Phenolic acids	Phenolic acids	-	B	1250500	1486600	1390500	0.00177541
Hmsp005129	281.17	151.07	280.167	C16H24O4	[M+H]+	[5]-Gingerol	Phenolic acids	Phenolic acids	41743-69-5	B	1338600	1334800	1311300	0.00171363
pmn001375	535.18	373.13	536.189	C26H32O12	[M-H]-	1-Hydroxypinoresinol-1-O-Glucoside	Lignans and Coumarins	Lignans	81495-71-8	B	1364300	1289700	1249700	0.00167873
Hmln001836	651.16	489.12	652.164	C29H32O17	[M-H]-	Kaempferol-3-O-(6''-Acetyl)glucosyl-(1→3)-Galactoside	Flavonoids	Flavonols	-	B	1259400	1268800	1239500	0.00162033
Hmsp005815	277.17	177.09	276.173	C17H24O3	[M+H]+	[6]-Shogaol	Phenolic acids	Phenolic acids	555-66-8	A	1282300	1261600	1186500	0.00160429
Hmtp000776	168.07	105.03	167.059	C8H9NO3	[M+H]+	4,5,6-Trihydroxy-2-cyclohexen-1-ylideneacetonitrile	Alkaloids	Alkaloids	-	B	1125700	1175700	1212700	0.00151126
mws0264	341.11	119	342.116	C12H22O11	[M-H]-	D-Trehalose	Others	Others	99-20-7	A	1185400	1160700	1075900	0.00147167
mws1482	237.18	135.12	236.178	C15H24O2	[M+H]+	Prehelminthosporol	Terpenoids	Sesquiterpenoids	1619-13-2	B	1129500	1114500	1161200	0.00146435
mws0885	153.02	109.03	154.027	C7H6O4	[M-H]-	2,4-Dihydroxybenzoic acid	Phenolic acids	Phenolic acids	89-86-1	A	1099800	1101800	1164100	0.00144737
Hmlp003129	359.15	137.06	358.142	C20H22O6	[M+H]+	Matairesinol	Lignans and Coumarins	Lignans	580-72-3	B	1084100	1043500	1125400	0.00139884
Lmdp003146	167.11	93.07	166.099	C10H14O2	[M+H]+	Rhododendrol	Phenolic acids	Phenolic acids	501-96-2	B	1083300	1108300	962460	0.00135654
pmn001501	369.13	204	370.142	C21H22O6	[M-H]-	Fargesin	Lignans and Coumarins	Lignans	31008-19-2	A	1046800	1001500	1002400	0.0013119
mws2212	179.03	135.05	180.042	C9H8O4	[M-H]-	Caffeic acid	Phenolic acids	Phenolic acids	331-39-5	A	1006900	976860	920150	0.00124884
Zmhn001793	341.09	179.03	342.096	C15H18O9	[M-H]-	6-O-Caffeoyl-D-glucose	Phenolic acids	Phenolic acids	-	B	858950	967210	920880	0.00118152
Hmmn003964	359.13	197.08	360.142	C16H24O9	[M-H]-	7-Deoxyloganic acid	Terpenoids	Monoterpenoids	22487-36-1	B	952000	788950	1003000	0.00117969
pmb2654	460.1	117.9	461.153	C19H27NO12	[M-H]-	Anthranilate-1-O-Sophoroside	Phenolic acids	Phenolic acids	-	B	836440	860030	843580	0.00109239
Hmpp004047	339.12	177.05	338.115	C20H18O5	[M+H]+	Demethoxycurcumin	Others	Others	22608-11-3	B	837480	818550	867490	0.00108518
mws1574	373.11	123	374.121	C16H22O10	[M-H]-	Geniposidic acid	Terpenoids	Monoterpenoids	27741-01-1	B	867750	817460	834420	0.0010835
Cmpp003619	193.05	105.07	192.042	C10H8O4	[M+H]+	6,7-Dihydroxy-4-methylcoumarin	Lignans and Coumarins	Coumarins	529-84-0	B	869920	814930	833390	0.00108289
pmn001380	187.1	169.09	188.105	C9H16O4	[M-H]-	Eucommiol	Others	Others	55930-44-4	A	791680	800830	771370	0.00101662
Hmpp003624	325.14	107.04	324.136	C20H20O4	[M+H]+	1-(4-Hydroxyphenyl)-7-(3-methoxy-4-hydroxyphenyl)-4,6-heptadiene-3-one	Phenolic acids	Phenolic acids	-	B	756540	773560	790080	0.000997799
pmn001420	341.09	179.04	342.095	C15H18O9	[M-H]-	1-O-[(E)-Caffeoyl]-D-glucose	Phenolic acids	Phenolic acids	-	B	770120	741400	807550	0.000997233
pme3443	207.07	192	208.074	C11H12O4	[M-H]-	Sinapinaldehyde	Phenolic acids	Phenolic acids	4206-58-0	B	722040	777510	724010	0.000956344
Hmjp003854	311.13	107.04	310.12	C19H18O4	[M+H]+	Dihydrodidemethoxy curcumin	Others	Others	-	B	764430	719570	730830	0.000952429
pme2596	184.06	148	183.053	C8H9NO4	[M+H]+	4-Pyridoxic acid	Others	Others	82-82-6	A	748600	746930	704320	0.000946076
Hmjp004204	235.17	137.09	234.161	C15H22O2	[M+H]+	(6S)-2-Methyl-6-[(1R,5S)-(4-methene-5-hydroxyl-2-cyclohexen)-2-hepten-4-one	Terpenoids	Sesquiterpenoids	-	B	725970	741240	718440	0.000939973
pmb0312	176.1	91.2	175.063	C10H9NO2	[M+H]+	5-Methoxyindole-3-carbaldehyde	Alkaloids	Plumerane	10601-19-1	B	712620	715100	743130	0.000933555
mws1526	359.13	197	358.126	C16H22O9	[M+H]+	Sweroside	Terpenoids	Sesquiterpenoids	14215-86-2	B	681870	743630	696540	0.000912688
Lmyp004084	153.13	107.09	152.12	C10H16O	[M+H]+	Perillyl alcohol	Terpenoids	Monoterpenoids	57717-97-2	B	695850	647160	720040	0.000887104
pme2954	303.05	137.02	302.043	C15H10O7	[M+H]+	Quercetin	Flavonoids	Flavonols	117-39-5	A	673570	673210	659490	0.000862806
mws0183	153.02	109.03	154.027	C7H6O4	[M-H]-	3,4-Dihydroxybenzoic acid (Protocatechuic acid)	Phenolic acids	Phenolic acids	99-50-3	A	645090	635260	660080	0.000834451
pmp001059	521.19	209.08	520.179	C22H32O14	[M+H]+	Genipin-1-O-(2''-O-apiosyl)glucoside	Terpenoids	Monoterpenoids	-	B	554510	551440	569860	0.000720664
pme2993	193.05	133	192.042	C10H8O4	[M+H]+	Scopoletin (7-Hydroxy-5-methoxycoumarin)	Lignans and Coumarins	Coumarins	92-61-5	B	550760	477920	414510	0.000620612
pmn001371	549.2	387.15	550.205	C27H34O12	[M-H]-	Eucommin A	Lignans and Coumarins	Lignans	99633-12-2	B	501690	418980	495420	0.000608838
Hmyp009288	221.18	163.15	220.182	C15H24O	[M+H]+	Epinootkatol	Terpenoids	Sesquiterpenoids	-	B	454040	490280	470350	0.000608434
Hmpn004989	249.15	205.16	250.157	C15H22O3	[M-H]-	5-Hydroxylbisabolon-9-one	Terpenoids	Sesquiterpenoids	-	B	463810	469950	458550	0.000598778
pme0085	359.08	196.7	360.084	C18H16O8	[M-H]-	Rosmarinic acid	Phenolic acids	Phenolic acids	537-15-5	B	411880	452500	507400	0.000589936
Hmln002355	549.2	387.15	550.204	C27H34O12	[M-H]-	5'-Methoxymatairesinoside	Lignans and Coumarins	Lignans	1691201-82-7	B	431370	449070	483820	0.000586692
mws0853	209.08	179	210.089	C11H14O4	[M-H]-	Sinapyl alcohol	Phenolic acids	Phenolic acids	537-33-7	B	441250	461530	451470	0.000582425
mws0027	197.05	123	198.053	C9H10O5	[M-H]-	Syringic acid	Phenolic acids	Phenolic acids	530-57-4	B	424210	462980	465560	0.000581791
pmb1912	474.17	327	473.166	C20H23N7O7	[M+H]+	10-Formyltetrahydrofuran	Alkaloids	Alkaloids	2800-34-2	B	446840	454850	437920	0.000576121
mws1090	259.02	97	260.03	C6H13O9P	[M-H]-	Glucose-1-phosphate	Others	Others	59-56-3	A	444960	424780	465580	0.0005742
pmb2979	549.12	387.1	550.132	C25H26O14	[M-H]-	Hesperetin-7-O-(6''-malonyl)glucoside	Flavonoids	Dihydroflavonol	-	B	465480	444220	416620	0.000570382
Lmmp002080	193.13	105.03	192.126	C11H16N2O	[M+H]+	N-(4-Aminobutyl)benzamide	Alkaloids	Phenolamine	5692-23-9	B	430890	399300	454660	0.000552472
pme0534	195.05	74.9	196.058	C6H12O7	[M-H]-	Gluconic acid	Others	Others	526-95-4	A	404650	435100	432780	0.000547287
pma1840	250.14	147	250.144	C14H20NO3+	[M]+	4-Coumaroylcholine	Alkaloids	Alkaloids	-	B	385450	428600	434550	0.000537003
Wmkn004187	441.19	279.16	442.199	C25H30O7	[M-H]-	Norkurarinol	Flavonoids	Flavonols	52483-01-9	B	378170	439900	426070	0.000535121
mws4085	223.06	193	224.068	C11H12O5	[M-H]-	Sinapic acid	Phenolic acids	Phenolic acids	530-59-6	B	406660	396290	431560	0.000530862
Lmsn003588	297.08	282.05	298.084	C17H14O5	[M-H]-	Pterocarpine	Flavonoids	Isoflavones	524-97-0	B	411730	423470	391600	0.000527623
mws0014	193.05	134.01	194.058	C10H10O4	[M-H]-	Ferulic acid	Phenolic acids	Phenolic acids	537-98-4	B	402050	386020	403850	0.000512553
mws1350	181.05	151	182.058	C9H10O4	[M-H]-	Syringaldehyde; 4-Hydroxy-3,5-Dimethoxybenzaldehyde	Phenolic acids	Phenolic acids	134-96-3	B	351270	401340	367390	0.000481738
Zmhn000892	301.09	139.05	302.1	C13H18O8	[M-H]-	4-O-Glucosyl-3,4-dihydroxybenzyl alcohol	Phenolic acids	Phenolic acids	-	B	359520	347800	386810	0.000470487
pmn001492	187.1	123.1	188.041	C11H8O3	[M-H]-	Ayapin	Lignans and Coumarins	Coumarins	494-56-4	B	359610	358960	364460	0.000465752
Zmln000899	343.11	181.05	344.111	C15H20O9	[M-H]-	Syringaldehyde-4-O-glucoside	Phenolic acids	Phenolic acids	-	B	370680	351390	351110	0.0004615
mws0043	403.14	373.1	402.131	C21H22O8	[M+H]+	Nobiletin (5,6,7,8,3',4'-Hexamethoxyflavone)	Flavonoids	Flavonoid	478-01-3	B	346620	334200	362460	0.000448627
pmn001710	521.13	359.08	522.137	C24H26O13	[M-H]-	Rosmarinic acid-3'-O-glucoside	Phenolic acids	Phenolic acids	910028-78-3	B	357060	341400	343800	0.000448205
Lmgn001670	137.03	108.02	138.032	C7H6O3	[M-H]-	Salicylic acid	Phenolic acids	Phenolic acids	69-72-7	B	386410	358140	294030	0.00044666
Cmbp003236	314.11	161.06	313.098	C14H19NO5S	[M+H]+	(E)-S-(3-(4-Hydroxy-3,5-dimethoxyphenyl)allyl)cysteine	Alkaloids	Alkaloids	-	B	326950	341830	364780	0.000444481
mws0180	153.02	109.03	154.027	C7H6O4	[M-H]-	2,5-Dihydroxybenzoic acid; Gentisic Acid	Phenolic acids	Phenolic acids	490-79-9	A	353350	323330	344060	0.00043892
Hmpp002532	385.16	137.05	384.157	C22H24O6	[M+H]+	1-(3-Methoxy-4-hydroxyphenyl)-7-(3,5-dimethoxy-4-hydroxyphenyl)-4,6-heptadiene-3-one	Phenolic acids	Phenolic acids	-	B	359630	316900	335370	0.000435106
Lmxp000939	136.06	119.04	135.054	C5H5N5	[M+H]+	Zarzissine	Alkaloids	Alkaloids	160568-14-9	A	334270	342420	315290	0.000426631
Lmmn000774	343.1	181.05	344.111	C15H20O9	[M-H]-	Dihydrocaffeoylglucose	Phenolic acids	Phenolic acids	-	B	296670	335930	329590	0.000413838
pmb2211	343.3	240.7	342.288	C19H38N2O3	[M+H]+	Cocamidopropyl betaine	Alkaloids	Alkaloids	4292-10-8	B	320500	311900	328030	0.000413011
MA10074217	144.05	115.04	145.053	C9H7NO	[M-H]-	4-Hydroxyquinoline	Alkaloids	Quinoline alkaloids	611-36-9	B	295790	296430	286310	0.00037782
Zmsp007375	373.13	343.08	372.121	C20H20O7	[M+H]+	3,5,7,3′4′-Pentamethoxyflavone	Flavonoids	Flavonoid	1247-97-8	B	294920	282200	296250	0.000375568
Hmcn002352	361.17	343.15	362.175	C20H26O6	[M-H]-	Ailantinol F	Others	Others	-	B	289410	310550	271160	0.000374679
Lmtn003096	523.21	361.14	524.226	C26H36O11	[M-H]-	Secoisolariciresinol 4-O-glucoside	Lignans and Coumarins	Lignans	-	B	285980	304800	278290	0.000373785
pmb1096	118.07	91	117.058	C8H7N	[M+H]+	Indole	Alkaloids	Plumerane	120-72-9	B	272160	287720	298860	0.00036931
pmn001367	315.07	153.02	316.079	C13H16O9	[M-H]-	Protocatechuic acid-4-O-glucoside	Phenolic acids	Phenolic acids	-	B	232280	275190	336690	0.000363031
pme1691	147.13	87.2	146.118	C7H16NO2	[M+H]+	Acetylcholine	Alkaloids	Alkaloids	60-31-1	B	279680	277240	284390	0.000361797
Lmmn001294	331.1	153.02	332.111	C14H20O9	[M-H]-	Koaburaside	Phenolic acids	Phenolic acids	41653-73-0	B	299610	284640	252490	0.000359848
pme1540	625.18	317.06	624.169	C28H32O16	[M+H]+	Isorhamnetin-3-O-neohesperidoside	Flavonoids	Flavonols	55033-90-4	A	242510	300750	279130	0.00035375
Zmtn001661	315.11	153.02	316.116	C14H20O8	[M-H]-	Vanilloloside	Others	Others	74950-96-2	B	220650	253900	308970	0.000336947
mws0898	165.09	105	164.084	C10H12O2	[M+H]+	Isoeugenol	Phenolic acids	Phenolic acids	97-54-1	B	271490	240490	267440	0.000335134
Hmsp006418	263.16	137.06	262.157	C16H22O3	[M+H]+	Methyl-[4]-Shogaol	Phenolic acids	Phenolic acids	-	A	251260	245470	259910	0.000325375
Lmmn004145	675.41	397.14	679.419	C38H60O10	[M-H]-	3-O-(2-O-Acetyl-glucosyl)oleanolic acid	Terpenoids	Triterpene	-	B	244550	277580	233600	0.000325072
mws1073	595.17	457.2	594.158	C27H30O15	[M+H]+	Apigenin-6,8-di-C-glucoside (Vicenin-2)	Flavonoids	Flavonoid	23666-13-9	A	228880	233180	228320	0.000296906
pmb2871	315.07	153	316.079	C13H16O9	[M-H]-	1-O-Gentisoyl-D-glucoside	Phenolic acids	Phenolic acids	23445-11-6	B	211270	224410	248180	0.00029409
Cmsp006710	275.13	137.06	274.12	C16H18O4	[M+H]+	3',4-Dihydroxy-3,5'-dimethoxybibenzyl	Others	Stilbene	83088-28-2	B	204670	221800	243290	0.000288032
Zmbp000555	175.12	130.1	174.079	C10H10N2O	[M+H]+	3-Indole acetamide	Alkaloids	Alkaloids	-	B	203850	202150	241140	0.00027827
pmp001225	339.12	119	338.115	C20H18O5	[M+H]+	Wighteone	Flavonoids	Isoflavones	51225-30-0	B	210110	193610	204760	0.00026165
Hmyp008444	311.16	145.06	310.156	C20H22O3	[M+H]+	Yakuchinone B	Others	Others	81840-57-5	B	195770	194490	197040	0.000252565
mws1212	209.08	177.3	208.074	C11H12O4	[M+H]+	Methyl ferulate	Phenolic acids	Phenolic acids	2309-07-1	B	209660	176410	190170	0.000247764
Lmfp001509	317.09	153.02	316.079	C13H16O9	[M+H]+	1-O-Galloyl-rhamnose	Tannins	Tannin	-	B	182400	192880	181650	0.000239528
Hmhp002580	413.14	136.07	412.133	C19H24O10	[M+H]+	Methylpicraquassioside A	Lignans and Coumarins	Coumarins	-	A	180730	183370	186540	0.000236803
Lmzn001582	387.17	207.1	388.174	C18H28O9	[M-H]-	5'-Glucosyloxyjasmanic acid	Phenolic acids	Phenolic acids	-	B	179870	175780	194180	0.000236435
Hmlp002744	375.14	137.06	374.136	C20H22O7	[M+H]+	Nortrachelogenin	Lignans and Coumarins	Lignans	34444-37-6	B	175860	173550	190630	0.000232228
pmb0819	157	130	156.069	C10H8N2	[M+H]+	3-Indoleacetonitrile	Alkaloids	Plumerane	771-51-7	B	177890	173230	187300	0.000231531
pmc0682	133.1	105.1	132.069	C8H8N2	[M+H]+	4-Aminoindole	Alkaloids	Plumerane	5192-23-4	B	201290	127740	200140	0.000227432
pmn001518	331.07	169.01	332.074	C13H16O10	[M-H]-	1-O-Galloyl-D-glucose	Tannins	Tannin	58511-73-2	B	185500	161120	169630	0.00022198
Hmpn004116	385.17	205.08	386.173	C22H26O6	[M-H]-	Gingerenone B	Others	Others	128700-98-1	B	173360	167360	172170	0.000220558
mws1078	138.05	92.1	137.048	C7H7NO2	[M+H]+	Anthranilic Acid	Phenolic acids	Phenolic acids	118-92-3	B	172300	161450	170930	0.000217018
Hmbn002692	517.16	175.04	518.164	C22H30O14	[M-H]-	6'-O-Feruloyl-D-sucrose	Phenolic acids	Phenolic acids	118230-77-6	B	176070	152010	143220	0.000202663
Zmhn001926	299.08	137.02	300.084	C13H16O8	[M-H]-	1-O-Salicyl-D-glucose	Phenolic acids	Phenolic acids	60517-74-0	B	164330	159240	146050	0.000201965
Zmhn002422	355.1	193.05	356.11	C16H20O9	[M-H]-	1-O-Feruloyl-D-Glucose	Phenolic acids	Phenolic acids	-	B	164730	151300	140210	0.0001962
mws0093	179.07	146	180.079	C10H12O3	[M-H]-	Coniferyl alcohol	Phenolic acids	Phenolic acids	458-35-5	B	135740	157990	160650	0.000195429
mws1333	341.11	113	342.116	C12H22O11	[M-H]-	Melibiose	Others	Others	585-99-9	A	143050	154910	145130	0.000190571
pmn001472	567.14	315	568.143	C25H28O15	[M-H]-	Polygalaxanthone III	Others	Xanthone	162857-78-5	B	160150	142340	135820	0.00018848
pmn001671	547.17	223.1	548.174	C23H32O15	[M-H]-	Furanofructosyl-α-D-(6-mustard acyl)glucoside*	Phenolic acids	Phenolic acids	-	B	124330	120560	147940	0.000168911
Lmdn003868	431.23	161.05	432.236	C21H36O9	[M-H]-	Frehmaglutoside G	Terpenoids	Terpene	-	A	121910	132810	135430	0.000167794
pmp000087	269.1	177.05	268.095	C13H16O6	[M+H]+	2-Feruloyl-sn-glycerol	Phenolic acids	Phenolic acids	-	B	130360	138920	118740	0.000166893
HJAP127	757.22	303.05	756.212	C33H40O20	[M+H]+	Quercetin-3-O-(2''-O-Rhamnosyl)rutinoside	Flavonoids	Flavonols	55696-57-6	B	133490	120290	116190	0.000159094
pmn001695	371.1	249.06	372.106	C16H20O10	[M-H]-	Trihydroxycinnamoylquinic acid	Phenolic acids	Phenolic acids	-	A	117010	112360	132360	0.000155541
pme2244	190.09	118.07	189.07	C11H11NO2	[M+H]+	3-Indolepropionic acid	Alkaloids	Plumerane	830-96-6	B	114730	114250	123260	0.000151473
pme0001	609.18	301	610.19	C28H34O15	[M-H]-	Hesperetin-7-O-neohesperidoside(Neohesperidin)	Flavonoids	Dihydroflavone	13241-33-3	B	112180	108560	109140	0.00014186
Zmap009745	345.1	330.07	344.09	C18H16O7	[M+H]+	Ayanin	Flavonoids	Flavonoid	572-32-7	A	113350	112840	102260	0.000141257
Hmjp003268	327.12	177.05	326.115	C19H18O5	[M+H]+	(E)-1-(3,4-Dihydroxyphenyl)-7-(4-hydroxyphenyl)hept-1-ene-3,5-dione	Phenolic acids	Phenolic acids	-	B	118650	104680	104470	0.000140955
Lmjp006533	345.1	330.07	344.09	C18H16O7	[M+H]+	Pachypodol (5,4'-dihydroxy-3,7,3'-trimethoxyflavone)	Flavonoids	Flavonoid	33708-72-4	B	105720	109640	107300	0.000138766
pmp000468	151.04	93.03	150.032	C8H6O3	[M+H]+	Piperonal	Phenolic acids	Phenolic acids	120-57-0	B	106500	102200	109040	0.000136634
mws1336	138.06	120	137.048	C7H7NO2	[M+H]+	4-Aminobenzoic acid	Phenolic acids	Phenolic acids	150-13-0	B	105680	98267	110310	0.000135129
pme3255	179.11	123	178.099	C11H14O2	[M+H]+	Methyleugenol	Phenolic acids	Phenolic acids	93-15-2	B	95730	112490	102080	0.000133471
pmn001672	547.17	223.1	548.174	C23H32O15	[M-H]-	Furanofructosyl-α-D-(3-mustard acyl)glucoside*	Phenolic acids	Phenolic acids	-	B	93867	97665	114220	0.00013148
Cmyp007180	181.12	107.09	180.115	C11H16O2	[M+H]+	Dihydroactinidiolide	Others	Others	17092-92-1	B	89865	106040	99188	0.000126928
pmf0291	96.04	68.05	95.037	C5H5NO	[M+H]+	4-Hydroxypyridine	Alkaloids	Alkaloids	626-64-2	B	90444	100030	99835	0.000124858
mws0036	609.18	301.09	610.19	C28H34O15	[M-H]-	Hesperetin-7-O-rutinoside (Hesperidin)	Flavonoids	Dihydroflavone	520-26-3	B	95525	99821	88771	0.000122198
Lmsp004166	611.16	303.05	610.153	C27H30O16	[M+H]+	Quercetin-3-O-glucoside-7-O-rhamnoside	Flavonoids	Flavonols	-	A	86259	95127	101990	0.00012187
Hmcp001824	213.07	167.06	212.058	C12H8N2O2	[M+H]+	Ailanindole	Alkaloids	Alkaloids	159903-51-2	B	93662	76512	104680	0.00011816
pmb2795	177	145	178.063	C10H10O3	[M-H]-	4-Methoxycinnamic acid	Phenolic acids	Phenolic acids	830-09-1	B	88848	93687	83611	0.000114469
mws0024	169.01	125	170.022	C7H6O5	[M-H]-	Gallic acid	Tannins	Tannin	149-91-7	B	84977	89312	88009	0.000112807
mws1567	307.1	119.05	308.105	C19H16O4	[M-H]-	Didemethoxycurcumin	Others	Others	33171-05-0	B	86083	87095	89111	0.000112797
pmb0108	375.2	137.1	374.1	C19H18O8	[M+H]+	Feruloyl syringic acid	Phenolic acids	Phenolic acids	-	B	78025	87706	88472	0.00010933
pmp000086	269.1	177.05	268.095	C13H16O6	[M+H]+	1-Feruloyl-sn-glycerol	Phenolic acids	Phenolic acids	-	B	87260	67955	91094	0.000105886
mws0983	326.31	62.06	325.298	C20H39NO2	[M+H]+	N-Oleoylethanolamine	Alkaloids	Alkaloids	111-58-0	B	81703	82259	77749	0.000103952
pmp001106	595.17	577.16	594.158	C27H30O15	[M+H]+	Vitexin-2''-O-glucoside	Flavonoids	Flavonoid carbonoside	61360-94-9	A	101170	71107	67343	0.000103018
pmf0440	163.08	91.1	162.068	C10H10O2	[M+H]+	4-MethoxycinnaMaldehyde	Phenolic acids	Phenolic acids	1963-36-6	B	79951	88061	70596	0.000102636
ML10197929	130.09	88.04	131.069	C4H9N3O2	[M-H]-	Creatine	Others	Others	57-00-1	B	76597	72404	80938	9.8874e-05
pme2268	138.05	94.07	137.048	C7H7NO2	[M+H]+	Trigonelline	Alkaloids	Alkaloids	535-83-1	A	78303	74626	74783	9.79233e-05
pme2459	449.11	287.2	448.101	C21H20O11	[M+H]+	Luteolin-7-O-glucoside (Cynaroside)*	Flavonoids	Flavonoid	5373-11-5	A	75763	80617	69168	9.70111e-05
mws0179	367.1	190.9	368.111	C17H20O9	[M-H]-	Chlorogenic acid methyl ester	Phenolic acids	Phenolic acids	29708-87-0	B	68930	70607	83502	9.59097e-05
pmn001642	503.08	459.1	504.09	C23H20O13	[M-H]-	Kaempferol-3-O-(2''-O-acetyl)glucuronide	Flavonoids	Flavonols	-	B	63872	68835	84030	9.32014e-05
mws1629	345.12	183.2	346.126	C15H22O9	[M-H]-	Aucubin	Terpenoids	Sesquiterpenoids	479-98-1	B	72549	70841	67002	9.04801e-05
mws1513	193.09	57	194.094	C11H14O3	[M-H]-	Zingerone	Phenolic acids	Phenolic acids	122-48-5	B	67543	63921	75803	8.91219e-05
mws0988	315.05	165	316.058	C16H12O7	[M-H]-	Rhamnetin	Flavonoids	Flavonols	90-19-7	B	67369	66695	72823	8.89662e-05
Lmhn003074	309.06	193.05	310.069	C14H14O8	[M-H]-	Feruloylmalic acid	Phenolic acids	Phenolic acids	-	B	64559	74465	58311	8.48874e-05
pmp001233	191.11	91.1	190.099	C12H14O2	[M+H]+	Butylphthalide	Others	Others	6066-49-5	B	64391	72695	60024	8.47861e-05
mws0444	152.04	108	153.043	C7H7NO3	[M-H]-	3-Aminosalicylic acid	Phenolic acids	Phenolic acids	570-23-0	B	61991	63917	66627	8.27997e-05
pme3459	317.21	299	316.204	C20H28O3	[M+H]+	Cafestol	Terpenoids	Ditepenoids	469-83-0	B	65839	54852	67584	8.09456e-05
pmb0142	165.1	95.2	164.047	C9H8O3	[M+H]+	Caffeic aldehyde	Phenolic acids	Phenolic acids	141632-15-7	B	57956	58139	71935	8.08518e-05
Hmln002806	335.08	179.03	336.085	C16H16O8	[M-H]-	5-O-Caffeoylshikimic acid	Phenolic acids	Phenolic acids	180981-12-8	B	67987	50919	65768	7.93886e-05
Lmsp004721	625.18	317.07	624.169	C28H32O16	[M+H]+	Tamarixetin-3-O-glucoside-7-O-rhamnoside	Flavonoids	Flavonoid	-	A	60598	60004	61418	7.82759e-05
Lmmp002463	625.18	317.07	624.169	C28H32O16	[M+H]+	Sexangularetin-3-O-glucoside-7-O-rhamnoside	Flavonoids	Flavonols	-	A	59361	59093	63003	7.80322e-05
Lmhp003217	625.17	317.06	624.169	C28H32O16	[M+H]+	2'-Hydoxy,5-methoxyGenistein-O-rhamnosyl-glucoside	Flavonoids	Isoflavones	-	A	61997	59435	59312	7.77262e-05
pme1724	137.06	91	136.052	C8H8O2	[M+H]+	Benzoic acid methyl ester	Phenolic acids	Phenolic acids	93-58-3	B	57318	61921	56109	7.5418e-05
Hmjp003516	325.11	147.04	324.1	C19H16O5	[M+H]+	O-Demethyldemethoxycurcumin	Phenolic acids	Phenolic acids	-	B	48162	61042	54572	7.04511e-05
pmn001739	519.15	183.1	520.158	C25H28O12	[M-H]-	6'-Trans-Cinnamoyl-8-epikingisidic acid	Phenolic acids	Phenolic acids	-	B	55372	54762	52217	6.98203e-05
HJN010	597.22	387.14	598.226	C28H38O14	[M-H]-	Ligraminol B	Others	Others	1335126-25-4	B	58137	43044	58003	6.84287e-05
pma3724	369.1	177.1	368.111	C17H20O9	[M+H]+	1-O-Feruloylquinic acid	Phenolic acids	Phenolic acids	-	B	46693	54027	54208	6.66347e-05
pma0675	153.05	135.04	152.047	C8H8O3	[M+H]+	o-Anisic acid	Phenolic acids	Phenolic acids	579-75-9	B	48171	52849	53005	6.62435e-05
Hmyp010491	313.18	137.06	312.172	C20H24O3	[M+H]+	Yakuchinone A	Others	Others	78954-23-1	B	52587	40418	60364	6.59274e-05
pmn001554	329.07	123	330.074	C17H14O7	[M-H]-	Petasiphenone	Phenolic acids	Phenolic acids	162616-81-1	B	46792	49589	54135	6.47289e-05
mws2368	137.06	119.05	138.068	C8H10O2	[M-H]-	Tyrosol	Phenolic acids	Phenolic acids	501-94-0	B	42303	44233	52607	5.98341e-05
Hmcp002207	479.12	317.06	478.111	C22H22O12	[M+H]+	Isorhamnetin-7-O-glucoside (Brassicin)	Flavonoids	Flavonols	6743-96-0	B	53013	39455	44087	5.87069e-05
mws0009	179.07	91	178.063	C10H10O3	[M+H]+	Coniferaldehyde	Phenolic acids	Phenolic acids	20649-42-7	B	42486	46174	45150	5.75498e-05
pme0241	123.04	79	122.037	C7H6O2	[M+H]+	Benzoic acid	Phenolic acids	Phenolic acids	65-85-0	B	48789	36595	45265	5.61654e-05
Zmjp010694	359.11	344.09	358.105	C19H18O7	[M+H]+	5-Hydroxy-3,7,3',4'-tetramethoxyflavone (Retusin)	Flavonoids	Flavonoid	1245-15-4	A	43484	41754	43931	5.55455e-05
Hmmn004283	195.07	136.05	196.074	C10H12O4	[M-H]-	Dihydroferulic Acid	Phenolic acids	Phenolic acids	1135-23-5	B	45355	43499	39416	5.51636e-05
Hmsp008707	305.21	121.06	304.204	C19H28O3	[M+H]+	[8]-Shogaol	Phenolic acids	Phenolic acids	36700-45-5	B	44672	39778	43632	5.50732e-05
Hmbp001276	169.05	65.03	168.042	C8H8O4	[M+H]+	Gallacetophenone	Phenolic acids	Phenolic acids	528-21-2	B	40421	41667	45028	5.4665e-05
mws2218	195.09	83.06	194.08	C8H10N4O2	[M+H]+	Caffeine	Alkaloids	Alkaloids	58-08-2	B	42989	42036	39260	5.34498e-05
Hmyp008708	285.08	242.06	284.068	C16H12O5	[M+H]+	Izalpinin	Flavonoids	Flavonols	480-14-8	B	44343	37009	42382	5.31995e-05
Lmbp007051	313.11	137.06	312.1	C18H16O5	[M+H]+	6-Hydroxy-2-[2-(3'-methoxy-4'-hydroxyphenylethyl)]chromone	Others	Others	-	B	41557	35247	39093	4.98315e-05
pmb0752	369.12	177.1	368.111	C17H20O9	[M+H]+	3-O-Feruloylquinic acid	Phenolic acids	Phenolic acids	1899-29-2	B	38560	32912	42542	4.9018e-05
Hmbn002174	135.05	120.02	136.053	C8H8O2	[M-H]-	4-Hydroxyacetophenone	Phenolic acids	Phenolic acids	99-93-4	B	39786	37097	35824	4.84676e-05
Cmsp005051	523.23	137.06	522.21	C26H34O11	[M+H]+	Isolariciresinol-9-O-glucoside	Lignans and Coumarins	Lignans	-	B	43396	35448	31664	4.75181e-05
Hmbp006861	445.15	177.05	444.142	C23H24O9	[M+H]+	1,2-O-Diferuloylglycerol	Phenolic acids	Phenolic acids	-	B	42107	33408	34691	4.73834e-05
mws1075	177.05	121	176.047	C10H8O3	[M+H]+	7-Methoxycoumarin	Lignans and Coumarins	Coumarins	531-59-9	B	37933	40528	30812	4.70032e-05
mws0178	353.09	191.01	354.095	C16H18O9	[M-H]-	Chlorogenic acid (3-O-Caffeoylquinic acid)*	Phenolic acids	Phenolic acids	327-97-9	B	43324	26582	32829	4.41578e-05
HJN037	183.03	124.02	184.037	C8H8O5	[M-H]-	4-O-Methylgallic Acid*	Phenolic acids	Phenolic acids	4319-02-2	B	30790	37345	25076	4.01021e-05
Lmtn002796	449.1	287.05	450.116	C21H22O11	[M-H]-	Aromadendrin-7-O-glucoside	Flavonoids	Flavonoid	28189-90-4	B	26444	33374	31486	3.92744e-05
Hmyn002232	329.11	165.05	330.114	C18H18O6	[M-H]-	Ficusal	Others	Others	-	B	27881	29470	33546	3.90888e-05
Hmgn004139	373.13	329.05	374.136	C20H22O7	[M-H]-	Isohydroxymatairesinol	Lignans and Coumarins	Lignans	-	B	30111	29833	30102	3.87237e-05
pme2598	167.03	123.04	168.042	C8H8O4	[M-H]-	3,4-Dihydroxybenzeneacetic acid	Phenolic acids	Phenolic acids	102-32-9	B	27363	30094	32326	3.86125e-05
mws1661	609.18	301	608.174	C28H32O15	[M+H]+	Diosmetin-7-O-rutinoside (Diosmin)	Flavonoids	Flavonoid	520-27-4	B	32513	24555	31419	3.80397e-05
pmn001319	413.12	398.1	414.131	C22H22O8	[M-H]-	1-O-Feruloyl-3-O-p-Coumaroylglycerol	Phenolic acids	Phenolic acids	-	B	28219	30879	26626	3.68718e-05
Hmbp002333	387.13	147.04	386.121	C17H22O10	[M+H]+	10-Dehydrogeniposide	Others	Others	-	B	29908	21376	30504	3.51564e-05
Lmhn004756	455.1	233.04	456.106	C23H20O10	[M-H]-	Cinnamoylferuloyltartaric acid	Phenolic acids	Phenolic acids	-	B	26876	26943	26923	3.47232e-05
Zmlp004119	175.04	91.06	174.032	C10H6O3	[M+H]+	Lawsone	Others	Others	83-72-7	B	28171	27048	24727	3.43813e-05
pme2996	161.02	116.6	162.032	C9H6O3	[M-H]-	4-Hydroxycoumarin	Lignans and Coumarins	Coumarins	1076-38-6	B	25990	23275	26925	3.27597e-05
pmn001419	325.09	163.04	326.1	C15H18O8	[M-H]-	1-O-[(E)-p-Cumaroyl]-D-glucose	Phenolic acids	Phenolic acids	-	B	19053	28385	27678	3.23145e-05
Lmhn002573	399.09	205.04	400.101	C17H20O11	[M-H]-	Sinapoylglucuronic acid	Phenolic acids	Phenolic acids	-	B	15454	23978	30556	3.01027e-05
mws1153	665.21	161.02	666.216	C31H38O16	[M-H]-	2'-Acetylacteoside	Phenolic acids	Phenolic acids	94492-24-7	B	26712	21720	20268	2.954e-05
pme0221	153.05	121	152.047	C8H8O3	[M+H]+	Methyl salicylate	Phenolic acids	Phenolic acids	119-36-8	B	24367	23327	20589	2.93661e-05
mws1038	277.12	146	278.13	C11H22N2O4S	[M-H]-	Pantetheine	Others	Others	496-65-1	B	16813	19171	24982	2.62165e-05
pme0309	183.03	124	184.037	C8H8O5	[M-H]-	3-O-Methylgallic Acid*	Tannins	Tannin	3934-84-7	B	15387	23633	21561	2.60636e-05
pme2623	158.12	112	159.126	C8H17NO2	[M-H]-	DL-2-Aminooctanoic acid	Alkaloids	Alkaloids	644-90-6	B	19060	16311	24983	2.59455e-05
Lmhn003223	279.05	147.04	280.058	C13H12O7	[M-H]-	Cinnamoyltartaric acid	Phenolic acids	Phenolic acids	-	B	20502	20939	18203	2.56525e-05
Xmyn004302	449.24	259.06	450.21	C20H34O11	[M-H]-	Ginkgoside A	Phenolic acids	Phenolic acids	-	B	16022	24862	17852	2.52746e-05
NK10246260	162.06	116.05	161.048	C9H7NO2	[M+H]+	2,4-Dihydroxyquinoline*	Alkaloids	Quinoline alkaloids	86-95-3	B	19026	18413	20028	2.47117e-05
mws0091	463.09	300.03	464.095	C21H20O12	[M-H]-	Quercetin-3-O-glucoside (Isoquercitrin)*	Flavonoids	Flavonols	482-35-9	A	21664	19842	15863	2.46726e-05
Hmdp005521	386.19	222.11	386.196	C22H28NO5+	[M]+	9-O-Methylstecepharine	Alkaloids	Alkaloids	-	B	17723	18849	20336	2.44734e-05
Lmhn001477	311.04	179.04	312.048	C13H12O9	[M-H]-	2-Caffeoyl-L-tartaric acid (Caftaric acid)	Phenolic acids	Phenolic acids	67879-58-7	B	17863	16257	22466	2.43282e-05
Hmpn002587	437.13	219.1	438.134	C21H26O8S	[M-H]-	1,7-Bis(4-hydroxy-3-methoxyphenyl)-5-oxoheptane-3-sulfonic acid	Others	Others	-	B	19047	19160	17987	2.41673e-05
Zmgp003492	373.12	105.03	372.121	C20H20O7	[M+H]+	8-Hydroxy-α-conidendrin	Others	Others	-	B	19612	17183	14735	2.21597e-05
mws1329	463.09	300.7	464.095	C21H20O12	[M-H]-	Quercetin-7-O-glucoside*	Flavonoids	Flavonols	491-50-9	A	19916	18829	12516	2.20485e-05
mws0856	463.09	301	464.095	C21H20O12	[M-H]-	Quercetin-4'-O-glucoside (Spiraeoside)*	Flavonoids	Flavonols	20229-56-5	A	27156	9636.2	14206	2.19088e-05
Hmdn006855	455.35	455.35	456.361	C30H48O3	[M-H]-	3,4-Cycloopen-cycloaltin-4(29),25-diene-24(R)-hydroxy-3-carboxylic acid	Others	Others	-	B	17344	15878	17012	2.16006e-05
Zmhn002301	325.09	163.04	326.1	C15H18O8	[M-H]-	p-Coumaric acid-4-O-glucoside	Phenolic acids	Phenolic acids	117405-48-8	B	17951	12115	20055	2.15419e-05
mws1640	205.13	101	204.126	C12H16N2O	[M+H]+	N-Methylcytisine	Alkaloids	Alkaloids	486-86-2	B	17420	16727	15785	2.14732e-05
pmb0672	771.21	463.1	770.206	C37H38O18	[M+H]+	Isovitexin-7-O-(6''-feruloyl)glucoside	Flavonoids	Flavonoid carbonoside	-	B	17650	13109	18403	2.1133e-05
pmb0130	203.12	144	202.111	C12H14N2O	[M+H]+	Acetryptine	Alkaloids	Phenolamine	3551-18-6	B	14286	16156	13145	1.8749e-05
pmn001369	697.23	535.18	698.242	C32H42O17	[M-H]-	1-Hydroxypineolin Diglucoside	Lignans and Coumarins	Lignans	-	B	15537	18800	8714.7	1.85258e-05
Lmlp001436	183.07	165.06	182.058	C9H10O4	[M+H]+	Dihydrocaffeic acid	Phenolic acids	Phenolic acids	1078-61-1	B	11845	15237	13835	1.76012e-05
mws0917	329.07	314	330.074	C17H14O7	[M-H]-	3,7-Di-O-methylquercetin	Flavonoids	Flavonols	2068-02-2	B	14037	13296	13570	1.75893e-05
Hmyn000254	297.12	59.01	298.12	C18H18O4	[M-H]-	Tababiphenyl C	Others	Others	1644433-50-0	B	10749	14666	14622	1.72223e-05
pmp000004	331.08	316.06	330.074	C17H14O7	[M+H]+	4',5,7-Trihydroxy-3',6-dimethoxyflavone (Jaceosidin)	Flavonoids	Flavonoid	18085-97-7	B	11959	14984	12962	1.71661e-05
mws0987	161.06	115	160.052	C10H8O2	[M+H]+	6-MethylCoumarin	Lignans and Coumarins	Coumarins	92-48-8	B	11691	11713	15022	1.65226e-05
mws2105	229.09	211.1	228.079	C14H12O3	[M+H]+	Benzyl salicylate	Phenolic acids	Phenolic acids	118-58-1	B	14886	10663	10741	1.56018e-05
pmb2620	207.07	133.1	208.074	C11H12O4	[M-H]-	3,4-Dimethoxycinnamic acid	Phenolic acids	Phenolic acids	14737-89-4	B	12222	11449	12125	1.53927e-05
Lmhn002926	279.05	163.04	280.058	C13H12O7	[M-H]-	p-Coumaroylmalic acid	Phenolic acids	Phenolic acids	-	B	12738	10384	12363	1.52562e-05
pme0460	291.09	139.04	290.079	C15H14O6	[M+H]+	Epicatechin	Flavonoids	Flavanols	490-46-0	B	12298	9740.3	8317.1	1.30526e-05
Hmdp001663	637.1	153.01	636.097	C27H24O18	[M+H]+	1,2,6-Tri-O-galloyl-glucose	Tannins	Tannin	-	B	11187	9550.2	9564.6	1.30295e-05
Hmyp007081	211.13	151.11	210.125	C12H18O3	[M+H]+	Oxyphyllenone B	Terpenoids	Sesquiterpenoids	-	B	7784.2	10074	11516	1.26338e-05
pmb2723	485.13	323.2	486.137	C21H26O13	[M-H]-	4-Hydroxycoumarin di-glucoside	Lignans and Coumarins	Coumarins	-	B	8300.2	8524	9883.2	1.14847e-05
Lmtp002822	535.14	499.12	534.137	C25H26O13	[M+H]+	Apigenin-6-C-arabinoside-8-C-xyloside	Flavonoids	Flavonoid carbonoside	-	A	6904.2	9867.6	8917.7	1.10518e-05
pme3131	221.08	177	220.074	C12H12O4	[M+H]+	6,7-Dimethoxy-4-methylcoumarin	Lignans and Coumarins	Coumarins	4281-40-7	B	9780.6	7294.5	8271.3	1.08967e-05
Hmyn008579	249.15	191.11	250.156	C15H22O3	[M-H]-	Oxyphyllol E	Terpenoids	Sesquiterpenoids	-	B	8051	8610.9	8278.9	1.07267e-05
Hmyn009687	251.17	191.14	252.172	C15H24O3	[M-H]-	Oxyphyllol D	Terpenoids	Sesquiterpenoids	-	B	8494.4	8247.5	6789	1.01203e-05
pmp001176	302.14	103.1	301.131	C17H19NO4	[M+H]+	Dihydrocaffeoyltyramine	Alkaloids	Phenolamine	-	B	10286	5412.4	7771	1.00858e-05
Lmhn003801	531.12	337.06	532.122	C25H24O13	[M-H]-	Feruloylsinapoyltartaric acid	Phenolic acids	Phenolic acids	-	B	6804.1	8215.6	8050.3	9.92294e-06
Lmhn004093	429.08	193.05	430.09	C21H18O10	[M-H]-	Benzoylferuloyltartaric acid	Phenolic acids	Phenolic acids	-	B	8497.7	7180	5659.2	9.17565e-06
pmp001079	595.17	449.1	594.158	C27H30O15	[M+H]+	Luteolin-7-O-neohesperidoside (Lonicerin)	Flavonoids	Flavonoid	25694-72-8	B	5193.2	6479.1	7785.5	8.36823e-06
Lmjp007790	329.1	314.08	328.095	C18H16O6	[M+H]+	5-Hydroxy-3,7,4'-trimethoxyflavone	Flavonoids	Flavonoid	-	B	6350.5	6242.5	5879.9	7.94443e-06
Hmln008119	197.12	153.12	198.125	C11H18O3	[M-H]-	Robinlin	Terpenoids	Terpene	-	A	4727.2	5620.8	6024.1	7.04149e-06
Hmbn005951	383.12	163.04	384.121	C21H20O7	[M-H]-	1,3-O-Di-p-Coumaroylglycerol	Phenolic acids	Phenolic acids	-	B	5537	5102	4676.7	6.58636e-06
Lmxn008846	197.12	153.13	198.126	C11H18O3	[M-H]-	Hydroxydihydrobovolide	Others	Others	6067-11-4	A	6016.2	4259.6	4903.7	6.5255e-06
pmn001669	237.08	147	238.084	C12H14O5	[M-H]-	Methyl sinapate	Phenolic acids	Phenolic acids	20733-94-2	B	5585.9	5018.4	4405.5	6.45481e-06
Lmyp001840	177.1	80.05	176.095	C10H12N2O	[M+H]+	6-Hydroxy-N-methylmyosmine	Alkaloids	Alkaloids	68104-57-4	B	4581.2	6655.6	3625.6	6.39622e-06
Hmhn006723	301.07	179.03	302.079	C16H14O6	[M-H]-	Disporopsin	Flavonoids	Flavonoid	-	B	4236.4	5380	5067.4	6.31627e-06
pme1665	593.15	311	594.158	C27H30O15	[M-H]-	Isovitexin-7-O-glucoside(Saponarin)	Flavonoids	Flavonoid carbonoside	20310-89-8	A	4249.8	4799.9	5042.7	6.06085e-06
mws1478	163.12	130	162.116	C10H14N2	[M+H]+	Nicotine	Alkaloids	Alkaloids	54-11-5	B	3059.8	5789.7	4996.4	5.95806e-06
pmp000003	317.07	302.04	316.058	C16H12O7	[M+H]+	Nepetin (5,7,3',4'-Tetrahydroxy-6-methoxyflavone)	Flavonoids	Flavonoid	520-11-6	B	4093.3	3456.7	6082.9	5.86009e-06
Hmpn005518	317.18	177.05	316.168	C19H24O4	[M-H]-	1,7-Diphenylheptane-1,3,5,7-tetraol	Phenolic acids	Phenolic acids	-	B	5772.7	4280.2	2955.9	5.59381e-06
Lmhn003799	501.1	307.05	502.111	C24H22O12	[M-H]-	Feruloylferuloyltartaric acid	Phenolic acids	Phenolic acids	-	B	2720.1	3711.8	5291.2	5.04139e-06
mws1297	269.1	101.02	270.11	C13H18O6	[M-H]-	Benzyl glucoside	Phenolic acids	Phenolic acids	4304-12-5	B	4317.7	3068.8	3418.4	4.64499e-06
mws0160	181.05	108	182.058	C9H10O4	[M-H]-	3,4-Dihydroxybenzoic Acid Ethyl Ester (Protocatechuic acid ethyl ester)	Phenolic acids	Phenolic acids	3943-89-3	B	3045.1	2870.9	3549	4.0697e-06
Hmyn010272	313.18	121.03	314.188	C20H26O3	[M-H]-	Oxyphyllacinol	Others	Others	-	B	1820.3	2656.6	2160.1	2.85555e-06
NK10264105	114.09	81.06	113.084	C6H11NO	[M+H]+	ε-Caprolactam	Alkaloids	Alkaloids	105-60-2	B	1413.2	1428.4	1686.2	1.947e-06
Lmjp002867	595.17	287.05	594.158	C27H30O15	[M+H]+	Kaempferol-3-O-neohesperidoside	Flavonoids	Flavonols	32602-81-6	A	1802.2	1213.4	1386.4	1.89229e-06
Lmsp004670	595.17	287.06	594.158	C27H30O15	[M+H]+	Kaempferol-3-O-glucoside-7-O-rhamnoside	Flavonoids	Flavonols	-	A	1565.6	787.6	1395.2	1.61067e-06
mws0038	313.07	283	314.079	C17H14O6	[M-H]-	Kumatakenin	Flavonoids	Flavonols	3301-49-3	B	1295.4	928.25	1243.5	1.4904e-06
mws0047	579.17	271.07	578.164	C27H30O14	[M+H]+	Apigenin-7-O-neohesperidoside (Rhoifolin)	Flavonoids	Flavonoid	17306-46-6	A	2241.9	9	9	9.69398e-07
mws2213	147.05	77.01	148.052	C9H8O2	[M-H]-	Cinnamic acid	Phenolic acids	Phenolic acids	140-10-3	A	403.39	592.37	528.89	6.55934e-07
mws1012	147.04	103	146.037	C9H6O2	[M+H]+	Coumarin	Lignans and Coumarins	Coumarins	91-64-5	B	9	9	9	1.16113e-08
pme2987	147.05	119	148.052	C9H8O2	[M-H]-	3,4-Dihydrocoumarin	Lignans and Coumarins	Coumarins	119-84-6	B	9	9	9	1.16113e-08
mws4002	154.09	137	153.079	C8H11NO2	[M+H]+	Dopamine	Alkaloids	Alkaloids	51-61-6	B	9	9	9	1.16113e-08
Lmgp001898	162.06	116.05	161.048	C9H7NO2	[M+H]+	4,6-Dihydroxyquinoline*	Alkaloids	Quinoline alkaloids	3517-61-1	B	9	9	9	1.16113e-08
pmb0813	176.1	133.2	175.063	C10H9NO2	[M+H]+	1-Methoxyindole-3-carbaldehyde	Alkaloids	Plumerane	67282-55-7	B	9	9	9	1.16113e-08
pme3140	175.04	131	176.047	C10H8O3	[M-H]-	6-Hydroxy-4-methylcoumarin	Lignans and Coumarins	Coumarins	2373-31-1	B	9	9	9	1.16113e-08
mws1500	177.09	130.9	176.084	C11H12O2	[M+H]+	Ethyl cinnamate	Phenolic acids	Phenolic acids	103-36-6	B	9	9	9	1.16113e-08
pme2836	178.09	160	177.079	C10H11NO2	[M+H]+	5-Hydroxytryptophol	Alkaloids	Plumerane	154-02-9	B	9	9	9	1.16113e-08
mws1195	179.07	147.1	178.063	C10H10O3	[M+H]+	p-Coumaric acid methyl ester	Phenolic acids	Phenolic acids	3943-97-3	B	9	9	9	1.16113e-08
mws4171	183.03	107.01	184.037	C8H8O5	[M-H]-	2,4,6-Trihydroxybenzoic acid methyl ester	Phenolic acids	Phenolic acids	3147-39-5	B	9	9	9	1.16113e-08
Zmtn001624	188.04	144.05	189.043	C10H7NO3	[M-H]-	N-Acetylisatin	Alkaloids	Plumerane	574-17-4	B	9	9	9	1.16113e-08
mws1611	191.11	117.07	190.099	C12H14O2	[M+H]+	Z-Ligustilide	Others	Others	4431-01-0	B	9	9	9	1.16113e-08
mws0597	190.05	146	191.058	C10H9NO3	[M-H]-	5-Hydroxyindole-3-acetic acid	Alkaloids	Plumerane	54-16-0	B	9	9	9	1.16113e-08
Hmcp002123	193.05	178.02	192.042	C10H8O4	[M+H]+	Isoscopoletin (6-Hydroxy-7-Methoxycoumarin)	Lignans and Coumarins	Coumarins	776-86-3	B	9	9	9	1.16113e-08
pme0422	193.06	134	194.058	C10H10O4	[M-H]-	Isoferulic Acid	Phenolic acids	Phenolic acids	537-73-5	B	9	9	9	1.16113e-08
mws1014	209.04	149.1	208.037	C10H8O5	[M+H]+	Fraxetin (7,8-Dihydroxy-6-methoxycoumarin)	Lignans and Coumarins	Coumarins	574-84-5	B	9	9	9	1.16113e-08
Hmyp006677	211.13	124.09	210.125	C12H18O3	[M+H]+	Oxyphyllenone A	Terpenoids	Sesquiterpenoids	363610-34-8	B	9	9	9	1.16113e-08
pmn001320	237.08	163.04	238.084	C12H14O5	[M-H]-	1-O-p-Cumaroylglycerol	Phenolic acids	Phenolic acids	106055-11-2	B	9	9	9	1.16113e-08
Hmyn009418	251.17	163.11	252.172	C15H24O3	[M-H]-	(11S)-Nootkatone-11,12-diol	Terpenoids	Sesquiterpenoids	-	B	9	9	9	1.16113e-08
mws1068	285.04	151	286.048	C15H10O6	[M-H]-	Kaempferol (3,5,7,4'-Tetrahydroxyflavone)	Flavonoids	Flavonols	520-18-3	A	9	9	9	1.16113e-08
Cmxn006627	285.04	185.06	286.048	C15H10O6	[M-H]-	Maritimetin	Flavonoids	Sinensetin	576-02-3	A	9	9	9	1.16113e-08
Hmjp003400	293.12	107.04	292.11	C19H16O3	[M+H]+	1,7-Bis-(4-hydroxyphenyl)-2,4,6-heptatrienone	Phenolic acids	Phenolic acids	-	B	9	9	9	1.16113e-08
Hmyp002315	303.04	257.04	302.042	C15H10O7	[M+H]+	3,5,7,4'-Tetrahydroxy-Coumaronochromone	Others	Others	-	B	9	9	9	1.16113e-08
pmb2601	307.1	161.1	308.09	C15H16O7	[M-H]-	7-Hydroxycoumarin-O-rhamnoside	Lignans and Coumarins	Coumarins	-	B	9	9	9	1.16113e-08
Lmtn003441	311.11	149.06	312.121	C15H20O7	[M-H]-	2-Acetyl-3-hydroxyphenyl-1-O-glucoside	Phenolic acids	Phenolic acids	-	B	9	9	9	1.16113e-08
mws1433	314.14	177.05	313.131	C18H19NO4	[M+H]+	N-Feruloyltyramine	Alkaloids	Phenolamine	66648-43-9	B	9	9	9	1.16113e-08
Cmzp002057	315.12	255.1	314.1	C14H18O8	[M+H]+	6-O-Acetylarbutin	Phenolic acids	Phenolic acids	10338-88-2	B	9	9	9	1.16113e-08
mws0744	319.05	301	320.053	C15H12O8	[M-H]-	Dihydromyricetin (Ampelopsin)	Flavonoids	Dihydroflavonol	27200-12-0	B	9	9	9	1.16113e-08
Hmjp003498	323.13	107.04	322.121	C20H18O4	[M+H]+	1-(4-Hydroxyphenyl)-7-(3-methoxy-4-hydroxyphenyl)-1,4,6-heptatriene-3-one	Phenolic acids	Phenolic acids	-	B	9	9	9	1.16113e-08
Lmtn002565	329.11	167.03	330.095	C14H18O9	[M-H]-	1-O-Vanilloyl-D-Glucose	Phenolic acids	Phenolic acids	-	B	9	9	9	1.16113e-08
Lmfn000604	331.07	169.01	332.074	C13H16O10	[M-H]-	6-O-Galloyl-D-glucose	Tannins	Tannin	13186-19-1	B	9	9	9	1.16113e-08
Hmln000873	331.07	169.01	332.075	C13H16O10	[M-H]-	2-O-Galloyl-D-glucose	Tannins	Tannin	-	B	9	9	9	1.16113e-08
pmb4777	337.09	161.1	338.1	C16H18O8	[M-H]-	4-Hydroxy-7-methoxycoumarin-β-rhamnoside	Lignans and Coumarins	Coumarins	-	B	9	9	9	1.16113e-08
mws0906	341.12	179	342.131	C16H22O8	[M-H]-	Coniferin	Phenolic acids	Phenolic acids	531-29-3	B	9	9	9	1.16113e-08
mws4108	353.14	189.1	352.131	C21H20O5	[M+H]+	1-Methoxyphaseollin	Lignans and Coumarins	Coumarins	157226-48-7	B	9	9	9	1.16113e-08
pmb2940	385.11	205	386.121	C17H22O10	[M-H]-	1-O-Glucosyl sinapate	Phenolic acids	Phenolic acids	78185-48-5	B	9	9	9	1.16113e-08
Hmpp004123	399.14	177.05	398.137	C22H22O7	[M+H]+	5'-Methoxycurcumin	Others	Others	-	B	9	9	9	1.16113e-08
pmb0681	403.1	367.08	402.095	C20H18O9	[M+H]+	Apigenin-8-C-Arabinoside	Flavonoids	Flavonoid	-	A	9	9	9	1.16113e-08
Hmpn002195	409.09	327.12	410.104	C19H22O8S	[M-H]-	1,7-Bis(3,4-dihydroxyphenyl)-5-oxoheptane-3-sulfonic acid	Others	Others	-	B	9	9	9	1.16113e-08
Lmhn003494	415.07	179.03	416.074	C20H16O10	[M-H]-	Caffeoylbenzoyltartaric acid	Phenolic acids	Phenolic acids	-	B	9	9	9	1.16113e-08
mws0919	431.1	285	432.106	C21H20O10	[M-H]-	Kaempferol-3-O-rhamnoside (Afzelin)(Kaempferin)*	Flavonoids	Flavonols	482-39-3	A	9	9	9	1.16113e-08
pme0321	431.1	285	432.106	C21H20O10	[M-H]-	Kaempferol-7-O-rhamnoside*	Flavonoids	Flavonols	20196-89-8	A	9	9	9	1.16113e-08
Lmdp003509	435.09	303.06	434.085	C20H18O11	[M+H]+	Quercetin-3-O-xyloside (Reynoutrin)	Flavonoids	Flavonols	549-32-6	B	9	9	9	1.16113e-08
mws2186	435.09	303	434.085	C20H18O11	[M+H]+	Avicularin(Quercetin-3-O-α-L-arabinofuranoside)	Flavonoids	Flavonols	572-30-5	B	9	9	9	1.16113e-08
mws0045	449.11	303.05	448.101	C21H20O11	[M+H]+	Quercetin-3-O-rhamnoside(Quercitrin)	Flavonoids	Flavonols	522-12-3	B	9	9	9	1.16113e-08
mws0089	447.09	285.04	448.101	C21H20O11	[M-H]-	Kaempferol-7-O-glucoside*	Flavonoids	Flavonols	16290-07-6	A	9	9	9	1.16113e-08
mws0913	447.09	285	448.101	C21H20O11	[M-H]-	Kaempferol-3-O-galactoside (Trifolin)*	Flavonoids	Flavonols	23627-87-4	A	9	9	9	1.16113e-08
Xmyp005654	449.11	287.06	448.101	C21H20O11	[M+H]+	Kaempferol-4'-O-glucoside*	Flavonoids	Flavonoid	-	A	9	9	9	1.16113e-08
Lmlp003531	449.11	287.06	448.101	C21H20O11	[M+H]+	Luteolin-3'-O-glucoside*	Flavonoids	Flavonoid	5154-41-6	A	9	9	9	1.16113e-08
mws2209	449.11	287.06	448.101	C21H20O11	[M+H]+	Kaempferol-3-O-glucoside (Astragalin)	Flavonoids	Flavonols	480-10-4	A	9	9	9	1.16113e-08
Lmyn006922	447.13	285.08	448.137	C22H24O10	[M-H]-	Sakuranin	Flavonoids	Flavonoid	529-39-5	B	9	9	9	1.16113e-08
mad2085	457.08	295.04	458.085	C22H18O11	[M-H]-	Caffeoyl-p-coumaroyltartaric acid	Phenolic acids	Phenolic acids	-	B	9	9	9	1.16113e-08
Zmhn003625	459.13	337.09	460.137	C23H24O10	[M-H]-	6-O-Glucosyl-feruloylbenzoic acid	Phenolic acids	Phenolic acids	-	B	9	9	9	1.16113e-08
pme1598	463.12	301	464.132	C22H24O11	[M-H]-	Hesperetin-5-O-glucoside	Flavonoids	Dihydroflavonol	69651-80-5	B	9	9	9	1.16113e-08
HJAP154	469.13	317.08	468.069	C23H16O11	[M+H]+	Galloylisorhamnetin	Flavonoids	Flavonols	-	B	9	9	9	1.16113e-08
Zmhn002508	471.15	309.1	472.158	C21H28O12	[M-H]-	4-p-Cumaroyl-rhamnosyl-(1→6)-D-glucose	Phenolic acids	Phenolic acids	-	B	9	9	9	1.16113e-08
Hmln002199	505.1	300.03	506.107	C23H22O13	[M-H]-	Quercetin-3-O-(6''-acetyl)galactoside	Flavonoids	Flavonols	-	B	9	9	9	1.16113e-08
pmn001564	505.17	59	506.179	C25H30O11	[M-H]-	Shomaside E	Phenolic acids	Phenolic acids	-	B	9	9	9	1.16113e-08
Wmzn002116	515.12	353.09	516.127	C25H24O12	[M-H]-	3,5-Dicaffeoylquinic acid	Phenolic acids	Phenolic acids	-	B	9	9	9	1.16113e-08
Li512111	519.11	315.05	520.122	C24H24O13	[M-H]-	Isorhamnetin-3-O-(6''-acetylglucoside)	Flavonoids	Flavonols	-	B	9	9	9	1.16113e-08
Wmhn005209	531.09	369.05	532.158	C26H28O12	[M-H]-	4,5,8-Trihydroxy-α-tetralone 5-O-D-[6'-O-(4''-propionyloxybenzoyl)]glucoside	Quinones	Quinones	-	B	9	9	9	1.16113e-08
Hmln002189	549.09	505.11	550.096	C24H22O15	[M-H]-	Quercetin-3-O-(6''-malonyl)galactoside	Flavonoids	Flavonols	-	B	9	9	9	1.16113e-08
mws1660	565.16	529.13	564.123	C26H28O14	[M+H]+	Schaftoside	Flavonoids	Flavonoid carbonoside	51938-32-0	A	9	9	9	1.16113e-08
Lmpp003930	579.15	271.06	578.142	C30H26O12	[M+H]+	Apigenin-7-O-(6''-p-Coumaryl)glucoside	Flavonoids	Flavonoid	-	A	9	9	9	1.16113e-08
mws1066	579.17	271	580.179	C27H32O14	[M-H]-	Naringenin-7-O-Rutinoside(Narirutin)	Flavonoids	Dihydroflavone	14259-46-2	A	9	9	9	1.16113e-08
mws0046	579.17	271.06	580.179	C27H32O14	[M-H]-	Naringenin-7-O-Neohesperidoside(Naringin)	Flavonoids	Dihydroflavone	10236-47-2	A	9	9	9	1.16113e-08
pme1605	593.15	285	594.158	C27H30O15	[M-H]-	Kaempferol-3-O-robinobioside(Biorobin)	Flavonoids	Flavonols	17297-56-2	A	9	9	9	1.16113e-08
Zmcp003989	595.16	287.05	594.158	C27H30O15	[M+H]+	Kaempferol-3-O-rhamnosyl(1→2)glucoside	Flavonoids	Flavonoid	-	A	9	9	9	1.16113e-08
Lmsn002815	593.15	285.04	594.158	C27H30O15	[M-H]-	Kaempferol-3-O-rutinoside(Nicotiflorin)	Flavonoids	Flavonoid	17650-84-9	B	9	9	9	1.16113e-08
Lmln001951	595.13	300.03	596.138	C26H28O16	[M-H]-	Quercetin-3-O-(6''-O-arabinosyl)glucoside	Flavonoids	Flavonols	-	B	9	9	9	1.16113e-08
pmp001080	609.18	463.12	608.174	C28H32O15	[M+H]+	Diosmetin-7-O-Neohesperidoside (Neodiosmin)	Flavonoids	Flavonoid	38665-01-9	B	9	9	9	1.16113e-08
mws0059	609.15	301	610.153	C27H30O16	[M-H]-	Quercetin-3-O-rutinoside (Rutin)*	Flavonoids	Flavonols	153-18-4	A	9	9	9	1.16113e-08
pmn001583	609.15	300	610.153	C27H30O16	[M-H]-	Quercetin-3-O-robinobioside*	Flavonoids	Flavonols	52525-35-6	A	9	9	9	1.16113e-08
pmp001310	627.16	303.1	626.148	C27H30O17	[M+H]+	6-Hydroxykaempferol-3,6-O-Diglucoside	Flavonoids	Flavonols	-	B	9	9	9	1.16113e-08
pmb0680	741.2	147.3	740.195	C36H36O17	[M+H]+	Vitexin-7-O-(6''-p-coumaroyl)glucoside	Flavonoids	Flavonoid carbonoside	-	B	9	9	9	1.16113e-08
Zmlp003063	741.23	433.12	740.209	C33H40O19	[M+H]+	Luteolin-7-O-(2''-O-rhamnosyl)rutinoside	Flavonoids	Flavonoid	-	B	9	9	9	1.16113e-08
mws1035	741.22	433	740.216	C33H40O19	[M+H]+	Kaempferol-3-O-robinoside-7-O-rhamnoside (Robinin)	Flavonoids	Flavonols	301-19-9	B	9	9	9	1.16113e-08
pmb2991	739.21	269.2	740.216	C33H40O19	[M-H]-	Apigenin-7-O-glucoside-4'-O-rutinoside	Flavonoids	Flavonoid	-	B	9	9	9	1.16113e-08
										Total	7.77104e+08	7.71727e+08	7.76503e+08

## Sheet: Content ranking of categories
Content ranking of ginger rhizome extract (GRE) categories
Category	Content
phenolic acids	0.4629
others	0.2055
alkaloids	0.1796
terpenoids	0.0518
flavonoids	0.0393
quinones	0.0393
lignans and coumarins	0.0209
tannins	0.0006

## Sheet: Phenolic acids
No	Index	Q1 (Da)	Q3 (Da)	Molecular Weight (Da)	Formula	Ionization model	Compounds	Class I	Class II	CAS	Level	Underground-part1	Underground-part2	Underground-part3	Ud-Content
1	mws0628	121.03	92	122.037	C7H6O2	[M-H]-	4-Hydroxybenzaldehyde	Phenolic acids	Phenolic acids	123-08-0	A	32261000	31545000	33605000	0.0418892
2	Hmsp006240	293.17	137.06	292.167	C17H24O4	[M+H]+	[6]-Gingerdione	Phenolic acids	Phenolic acids	61871-71-4	A	27962000	27515000	27353000	0.0356207
3	Hmsp007523	319.22	191.1	318.219	C20H30O3	[M+H]+	Methyl-[8]-Shogaol	Phenolic acids	Phenolic acids	863780-79-4	A	27788000	26298000	25532000	0.0342386
4	Hmsp007678	507.27	137.06	506.288	C28H42O8	[M+H]+	Methyl-diacetoxy-[8]-gingerdiol	Phenolic acids	Phenolic acids	-	A	24408000	24920000	26022000	0.032404
5	mws1561	349.24	56.9	350.246	C21H34O4	[M-H]-	[10]-Gingerol	Phenolic acids	Phenolic acids	23513-15-7	A	24285000	23165000	22880000	0.0302444
6	mws1686	167.07	121	166.063	C9H10O3	[M+H]+	Paeonol	Phenolic acids	Phenolic acids	552-41-0	B	19982000	20016000	20656000	0.0260838
7	Hmsp006419	279.19	137.06	278.188	C17H26O3	[M+H]+	[6]-Paradol	Phenolic acids	Phenolic acids	27113-22-0	A	16295000	16252000	16437000	0.0210654
8	Hmsp008976	361.27	177.09	360.266	C23H36O3	[M+H]+	[12]-Shogaol	Phenolic acids	Phenolic acids	99742-10-6	B	15771000	15633000	15861000	0.020326
9	Hmsp007106	335.26	151.07	334.251	C21H34O3	[M+H]+	[10]-Paradol	Phenolic acids	Phenolic acids	36700-48-8	A	14550000	15078000	15464000	0.0193921
10	Hmsp007962	333.24	177.09	332.235	C21H32O3	[M+H]+	[10]-Shogaol	Phenolic acids	Phenolic acids	36752-54-2	A	14314000	14267000	13782000	0.0182185
11	pmn001517	329.12	167	330.131	C15H22O8	[M-H]-	3,4,5-Trimethoxyphenyl-1-O-Glucoside	Phenolic acids	Phenolic acids	-	B	13793000	12894000	14493000	0.0177072
12	pme1439	165.05	119	164.047	C9H8O3	[M+H]+	p-Coumaric acid	Phenolic acids	Phenolic acids	501-98-4	A	11135000	11090000	11222000	0.0143837
13	Hmsp007050	353.23	151.07	352.189	C19H28O6	[M+H]+	[4]-Gingerdiol	Phenolic acids	Phenolic acids	863780-88-5	A	10695000	8678000	8384700	0.0119352
14	Hmpn002991	375.18	135.04	376.189	C21H28O6	[M-H]-	1,7-Bis(4-hydroxy-3-methoxyphenyl)heptane-3,5-diol	Phenolic acids	Phenolic acids	-	A	9757300	9271200	8595000	0.0118795
15	Hmpp003343	355.15	137.05	354.147	C21H22O5	[M+H]+	1,7-Bis(4-Hydroxy-3-Methoxyphenyl)Hepta-4,6-Dien-3-One	Phenolic acids	Phenolic acids	-	B	8208900	8410700	7915800	0.0105521
16	mws1560	293.18	99.1	294.183	C17H26O4	[M-H]-	[6]-Gingerol	Phenolic acids	Phenolic acids	23513-14-6	A	7930900	8050700	8465200	0.0105132
17	Hmsp005892	249.14	137.06	248.141	C15H20O3	[M+H]+	[4]-Shogaol	Phenolic acids	Phenolic acids	-	A	8012600	7677900	7740300	0.010076
18	Hmsp006266	291.2	177.06	290.188	C18H26O3	[M+H]+	Methyl-[6]-Shogaol	Phenolic acids	Phenolic acids	-	A	7750800	7761000	7445400	0.009873
19	Hmsn002272	327.11	165.05	328.116	C15H20O8	[M-H]-	Demethyl coniferin	Phenolic acids	Phenolic acids	-	B	7128300	6899400	6595800	0.00886911
20	Hmsp004517	267.15	137.06	266.152	C15H22O4	[M+H]+	[4]-Gingerol	Phenolic acids	Phenolic acids	77398-90-4	A	4285500	4497500	4694000	0.00579586
21	pme0281	165.02	121.03	166.027	C8H6O4	[M-H]-	Terephthalic acid	Phenolic acids	Phenolic acids	100-21-0	A	3891800	3951000	3754900	0.00498781
22	mws0028	167.03	108.02	168.042	C8H8O4	[M-H]-	Vanillic acid	Phenolic acids	Phenolic acids	121-34-6	A	3822000	3618300	3617700	0.00475527
23	Hmsp007306	307.21	151.07	306.219	C19H30O3	[M+H]+	[8]-Paradol	Phenolic acids	Phenolic acids	27113-23-1	A	3771500	3641300	3605600	0.00473834
24	pmp001285	149.02	65.04	148.016	C8H4O3	[M+H]+	Phthalic anhydride	Phenolic acids	Phenolic acids	85-44-9	A	3403100	3331000	3379200	0.00434911
25	mws0749	137.02	93	138.032	C7H6O3	[M-H]-	4-Hydroxybenzoic acid	Phenolic acids	Phenolic acids	99-96-7	B	2994300	3050000	3035300	0.00390475
26	Hmsp007613	321.2	137.06	320.199	C19H28O4	[M+H]+	[8]-Gingerdione	Phenolic acids	Phenolic acids	77334-06-6	A	3024300	2918600	2915800	0.00380957
27	pmb3107	359.1	182.1	360.106	C15H20O10	[M-H]-	Glucosyringic Acid	Phenolic acids	Phenolic acids	-	B	2283100	2215500	2326200	0.00293484
28	mws0458	151.04	136	152.047	C8H8O3	[M-H]-	Vanillin	Phenolic acids	Phenolic acids	121-33-5	A	2110300	2180300	2153000	0.00277117
29	Hmgn001653	137.02	93.04	138.032	C7H6O3	[M-H]-	Protocatechualdehyde	Phenolic acids	Phenolic acids	139-85-5	B	2061400	1921500	2062000	0.00259934
30	Lmlp012720	279.16	149.02	278.152	C16H22O4	[M+H]+	Dibutyl phthalate	Phenolic acids	Phenolic acids	84-74-2	A	1875900	1853100	1778100	0.00236836
31	Lmxp011770	279.16	149.02	278.152	C16H22O4	[M+H]+	Diisobutyl phthalate	Phenolic acids	Phenolic acids	84-69-5	A	1834800	1794700	1826000	0.00234607
32	Hmsp006378	309.2	177.09	308.199	C18H28O4	[M+H]+	Methyl-[6]-gingerol	Phenolic acids	Phenolic acids	61914-52-1	A	1638600	1631500	1607200	0.00209749
33	mws0467	165.06	119.05	166.063	C9H10O3	[M-H]-	3-(4-Hydroxyphenyl)-propionic acid	Phenolic acids	Phenolic acids	501-97-3	B	1474200	1472700	1437500	0.00188554
34	Zmhn002227	385.11	223.06	386.121	C17H22O10	[M-H]-	4-O-Glucosyl-sinapate	Phenolic acids	Phenolic acids	-	B	1250500	1486600	1390500	0.00177541
35	Hmsp005129	281.17	151.07	280.167	C16H24O4	[M+H]+	[5]-Gingerol	Phenolic acids	Phenolic acids	41743-69-5	B	1338600	1334800	1311300	0.00171363
36	Hmsp005815	277.17	177.09	276.173	C17H24O3	[M+H]+	[6]-Shogaol	Phenolic acids	Phenolic acids	555-66-8	A	1282300	1261600	1186500	0.00160429
37	mws0885	153.02	109.03	154.027	C7H6O4	[M-H]-	2,4-Dihydroxybenzoic acid	Phenolic acids	Phenolic acids	89-86-1	A	1099800	1101800	1164100	0.00144737
38	Lmdp003146	167.11	93.07	166.099	C10H14O2	[M+H]+	Rhododendrol	Phenolic acids	Phenolic acids	501-96-2	B	1083300	1108300	962460	0.00135654
39	mws2212	179.03	135.05	180.042	C9H8O4	[M-H]-	Caffeic acid	Phenolic acids	Phenolic acids	331-39-5	A	1006900	976860	920150	0.00124884
40	Zmhn001793	341.09	179.03	342.096	C15H18O9	[M-H]-	6-O-Caffeoyl-D-glucose	Phenolic acids	Phenolic acids	-	B	858950	967210	920880	0.00118152
41	pmb2654	460.1	117.9	461.153	C19H27NO12	[M-H]-	Anthranilate-1-O-Sophoroside	Phenolic acids	Phenolic acids	-	B	836440	860030	843580	0.00109239
42	Hmpp003624	325.14	107.04	324.136	C20H20O4	[M+H]+	1-(4-Hydroxyphenyl)-7-(3-methoxy-4-hydroxyphenyl)-4,6-heptadiene-3-one	Phenolic acids	Phenolic acids	-	B	756540	773560	790080	0.000997799
43	pmn001420	341.09	179.04	342.095	C15H18O9	[M-H]-	1-O-[(E)-Caffeoyl]-D-glucose	Phenolic acids	Phenolic acids	-	B	770120	741400	807550	0.000997233
44	pme3443	207.07	192	208.074	C11H12O4	[M-H]-	Sinapinaldehyde	Phenolic acids	Phenolic acids	4206-58-0	B	722040	777510	724010	0.000956344
45	mws0183	153.02	109.03	154.027	C7H6O4	[M-H]-	3,4-Dihydroxybenzoic acid (Protocatechuic acid)	Phenolic acids	Phenolic acids	99-50-3	A	645090	635260	660080	0.000834451
46	pme0085	359.08	196.7	360.084	C18H16O8	[M-H]-	Rosmarinic acid	Phenolic acids	Phenolic acids	537-15-5	B	411880	452500	507400	0.000589936
47	mws0853	209.08	179	210.089	C11H14O4	[M-H]-	Sinapyl alcohol	Phenolic acids	Phenolic acids	537-33-7	B	441250	461530	451470	0.000582425
48	mws0027	197.05	123	198.053	C9H10O5	[M-H]-	Syringic acid	Phenolic acids	Phenolic acids	530-57-4	B	424210	462980	465560	0.000581791
49	mws4085	223.06	193	224.068	C11H12O5	[M-H]-	Sinapic acid	Phenolic acids	Phenolic acids	530-59-6	B	406660	396290	431560	0.000530862
50	mws0014	193.05	134.01	194.058	C10H10O4	[M-H]-	Ferulic acid	Phenolic acids	Phenolic acids	537-98-4	B	402050	386020	403850	0.000512553
51	mws1350	181.05	151	182.058	C9H10O4	[M-H]-	Syringaldehyde; 4-Hydroxy-3,5-Dimethoxybenzaldehyde	Phenolic acids	Phenolic acids	134-96-3	B	351270	401340	367390	0.000481738
52	Zmhn000892	301.09	139.05	302.1	C13H18O8	[M-H]-	4-O-Glucosyl-3,4-dihydroxybenzyl alcohol	Phenolic acids	Phenolic acids	-	B	359520	347800	386810	0.000470487
53	Zmln000899	343.11	181.05	344.111	C15H20O9	[M-H]-	Syringaldehyde-4-O-glucoside	Phenolic acids	Phenolic acids	-	B	370680	351390	351110	0.0004615
54	pmn001710	521.13	359.08	522.137	C24H26O13	[M-H]-	Rosmarinic acid-3'-O-glucoside	Phenolic acids	Phenolic acids	910028-78-3	B	357060	341400	343800	0.000448205
55	Lmgn001670	137.03	108.02	138.032	C7H6O3	[M-H]-	Salicylic acid	Phenolic acids	Phenolic acids	69-72-7	B	386410	358140	294030	0.00044666
56	mws0180	153.02	109.03	154.027	C7H6O4	[M-H]-	2,5-Dihydroxybenzoic acid; Gentisic Acid	Phenolic acids	Phenolic acids	490-79-9	A	353350	323330	344060	0.00043892
57	Hmpp002532	385.16	137.05	384.157	C22H24O6	[M+H]+	1-(3-Methoxy-4-hydroxyphenyl)-7-(3,5-dimethoxy-4-hydroxyphenyl)-4,6-heptadiene-3-one	Phenolic acids	Phenolic acids	-	B	359630	316900	335370	0.000435106
58	Lmmn000774	343.1	181.05	344.111	C15H20O9	[M-H]-	Dihydrocaffeoylglucose	Phenolic acids	Phenolic acids	-	B	296670	335930	329590	0.000413838
59	pmn001367	315.07	153.02	316.079	C13H16O9	[M-H]-	Protocatechuic acid-4-O-glucoside	Phenolic acids	Phenolic acids	-	B	232280	275190	336690	0.000363031
60	Lmmn001294	331.1	153.02	332.111	C14H20O9	[M-H]-	Koaburaside	Phenolic acids	Phenolic acids	41653-73-0	B	299610	284640	252490	0.000359848
61	mws0898	165.09	105	164.084	C10H12O2	[M+H]+	Isoeugenol	Phenolic acids	Phenolic acids	97-54-1	B	271490	240490	267440	0.000335134
62	Hmsp006418	263.16	137.06	262.157	C16H22O3	[M+H]+	Methyl-[4]-Shogaol	Phenolic acids	Phenolic acids	-	A	251260	245470	259910	0.000325375
63	pmb2871	315.07	153	316.079	C13H16O9	[M-H]-	1-O-Gentisoyl-D-glucoside	Phenolic acids	Phenolic acids	23445-11-6	B	211270	224410	248180	0.00029409
64	mws1212	209.08	177.3	208.074	C11H12O4	[M+H]+	Methyl ferulate	Phenolic acids	Phenolic acids	2309-07-1	B	209660	176410	190170	0.000247764
65	Lmzn001582	387.17	207.1	388.174	C18H28O9	[M-H]-	5'-Glucosyloxyjasmanic acid	Phenolic acids	Phenolic acids	-	B	179870	175780	194180	0.000236435
66	mws1078	138.05	92.1	137.048	C7H7NO2	[M+H]+	Anthranilic Acid	Phenolic acids	Phenolic acids	118-92-3	B	172300	161450	170930	0.000217018
67	Hmbn002692	517.16	175.04	518.164	C22H30O14	[M-H]-	6'-O-Feruloyl-D-sucrose	Phenolic acids	Phenolic acids	118230-77-6	B	176070	152010	143220	0.000202663
68	Zmhn001926	299.08	137.02	300.084	C13H16O8	[M-H]-	1-O-Salicyl-D-glucose	Phenolic acids	Phenolic acids	60517-74-0	B	164330	159240	146050	0.000201965
69	Zmhn002422	355.1	193.05	356.11	C16H20O9	[M-H]-	1-O-Feruloyl-D-Glucose	Phenolic acids	Phenolic acids	-	B	164730	151300	140210	0.0001962
70	mws0093	179.07	146	180.079	C10H12O3	[M-H]-	Coniferyl alcohol	Phenolic acids	Phenolic acids	458-35-5	B	135740	157990	160650	0.000195429
71	pmn001671	547.17	223.1	548.174	C23H32O15	[M-H]-	Furanofructosyl-α-D-(6-mustard acyl)glucoside*	Phenolic acids	Phenolic acids	-	B	124330	120560	147940	0.000168911
72	pmp000087	269.1	177.05	268.095	C13H16O6	[M+H]+	2-Feruloyl-sn-glycerol	Phenolic acids	Phenolic acids	-	B	130360	138920	118740	0.000166893
73	pmn001695	371.1	249.06	372.106	C16H20O10	[M-H]-	Trihydroxycinnamoylquinic acid	Phenolic acids	Phenolic acids	-	A	117010	112360	132360	0.000155541
74	Hmjp003268	327.12	177.05	326.115	C19H18O5	[M+H]+	(E)-1-(3,4-Dihydroxyphenyl)-7-(4-hydroxyphenyl)hept-1-ene-3,5-dione	Phenolic acids	Phenolic acids	-	B	118650	104680	104470	0.000140955
75	pmp000468	151.04	93.03	150.032	C8H6O3	[M+H]+	Piperonal	Phenolic acids	Phenolic acids	120-57-0	B	106500	102200	109040	0.000136634
76	mws1336	138.06	120	137.048	C7H7NO2	[M+H]+	4-Aminobenzoic acid	Phenolic acids	Phenolic acids	150-13-0	B	105680	98267	110310	0.000135129
77	pme3255	179.11	123	178.099	C11H14O2	[M+H]+	Methyleugenol	Phenolic acids	Phenolic acids	93-15-2	B	95730	112490	102080	0.000133471
78	pmn001672	547.17	223.1	548.174	C23H32O15	[M-H]-	Furanofructosyl-α-D-(3-mustard acyl)glucoside*	Phenolic acids	Phenolic acids	-	B	93867	97665	114220	0.00013148
79	pmb2795	177	145	178.063	C10H10O3	[M-H]-	4-Methoxycinnamic acid	Phenolic acids	Phenolic acids	830-09-1	B	88848	93687	83611	0.000114469
80	pmb0108	375.2	137.1	374.1	C19H18O8	[M+H]+	Feruloyl syringic acid	Phenolic acids	Phenolic acids	-	B	78025	87706	88472	0.00010933
81	pmp000086	269.1	177.05	268.095	C13H16O6	[M+H]+	1-Feruloyl-sn-glycerol	Phenolic acids	Phenolic acids	-	B	87260	67955	91094	0.000105886
82	pmf0440	163.08	91.1	162.068	C10H10O2	[M+H]+	4-MethoxycinnaMaldehyde	Phenolic acids	Phenolic acids	1963-36-6	B	79951	88061	70596	0.000102636
83	mws0179	367.1	190.9	368.111	C17H20O9	[M-H]-	Chlorogenic acid methyl ester	Phenolic acids	Phenolic acids	29708-87-0	B	68930	70607	83502	9.59097e-05
84	mws1513	193.09	57	194.094	C11H14O3	[M-H]-	Zingerone	Phenolic acids	Phenolic acids	122-48-5	B	67543	63921	75803	8.91219e-05
85	Lmhn003074	309.06	193.05	310.069	C14H14O8	[M-H]-	Feruloylmalic acid	Phenolic acids	Phenolic acids	-	B	64559	74465	58311	8.48874e-05
86	mws0444	152.04	108	153.043	C7H7NO3	[M-H]-	3-Aminosalicylic acid	Phenolic acids	Phenolic acids	570-23-0	B	61991	63917	66627	8.27997e-05
87	pmb0142	165.1	95.2	164.047	C9H8O3	[M+H]+	Caffeic aldehyde	Phenolic acids	Phenolic acids	141632-15-7	B	57956	58139	71935	8.08518e-05
88	Hmln002806	335.08	179.03	336.085	C16H16O8	[M-H]-	5-O-Caffeoylshikimic acid	Phenolic acids	Phenolic acids	180981-12-8	B	67987	50919	65768	7.93886e-05
89	pme1724	137.06	91	136.052	C8H8O2	[M+H]+	Benzoic acid methyl ester	Phenolic acids	Phenolic acids	93-58-3	B	57318	61921	56109	7.5418e-05
90	Hmjp003516	325.11	147.04	324.1	C19H16O5	[M+H]+	O-Demethyldemethoxycurcumin	Phenolic acids	Phenolic acids	-	B	48162	61042	54572	7.04511e-05
91	pmn001739	519.15	183.1	520.158	C25H28O12	[M-H]-	6'-Trans-Cinnamoyl-8-epikingisidic acid	Phenolic acids	Phenolic acids	-	B	55372	54762	52217	6.98203e-05
92	pma3724	369.1	177.1	368.111	C17H20O9	[M+H]+	1-O-Feruloylquinic acid	Phenolic acids	Phenolic acids	-	B	46693	54027	54208	6.66347e-05
93	pma0675	153.05	135.04	152.047	C8H8O3	[M+H]+	o-Anisic acid	Phenolic acids	Phenolic acids	579-75-9	B	48171	52849	53005	6.62435e-05
94	pmn001554	329.07	123	330.074	C17H14O7	[M-H]-	Petasiphenone	Phenolic acids	Phenolic acids	162616-81-1	B	46792	49589	54135	6.47289e-05
95	mws2368	137.06	119.05	138.068	C8H10O2	[M-H]-	Tyrosol	Phenolic acids	Phenolic acids	501-94-0	B	42303	44233	52607	5.98341e-05
96	mws0009	179.07	91	178.063	C10H10O3	[M+H]+	Coniferaldehyde	Phenolic acids	Phenolic acids	20649-42-7	B	42486	46174	45150	5.75498e-05
97	pme0241	123.04	79	122.037	C7H6O2	[M+H]+	Benzoic acid	Phenolic acids	Phenolic acids	65-85-0	B	48789	36595	45265	5.61654e-05
98	Hmmn004283	195.07	136.05	196.074	C10H12O4	[M-H]-	Dihydroferulic Acid	Phenolic acids	Phenolic acids	1135-23-5	B	45355	43499	39416	5.51636e-05
99	Hmsp008707	305.21	121.06	304.204	C19H28O3	[M+H]+	[8]-Shogaol	Phenolic acids	Phenolic acids	36700-45-5	B	44672	39778	43632	5.50732e-05
100	Hmbp001276	169.05	65.03	168.042	C8H8O4	[M+H]+	Gallacetophenone	Phenolic acids	Phenolic acids	528-21-2	B	40421	41667	45028	5.4665e-05
101	pmb0752	369.12	177.1	368.111	C17H20O9	[M+H]+	3-O-Feruloylquinic acid	Phenolic acids	Phenolic acids	1899-29-2	B	38560	32912	42542	4.9018e-05
102	Hmbn002174	135.05	120.02	136.053	C8H8O2	[M-H]-	4-Hydroxyacetophenone	Phenolic acids	Phenolic acids	99-93-4	B	39786	37097	35824	4.84676e-05
103	Hmbp006861	445.15	177.05	444.142	C23H24O9	[M+H]+	1,2-O-Diferuloylglycerol	Phenolic acids	Phenolic acids	-	B	42107	33408	34691	4.73834e-05
104	mws0178	353.09	191.01	354.095	C16H18O9	[M-H]-	Chlorogenic acid (3-O-Caffeoylquinic acid)*	Phenolic acids	Phenolic acids	327-97-9	B	43324	26582	32829	4.41578e-05
105	HJN037	183.03	124.02	184.037	C8H8O5	[M-H]-	4-O-Methylgallic Acid*	Phenolic acids	Phenolic acids	4319-02-2	B	30790	37345	25076	4.01021e-05
106	pme2598	167.03	123.04	168.042	C8H8O4	[M-H]-	3,4-Dihydroxybenzeneacetic acid	Phenolic acids	Phenolic acids	102-32-9	B	27363	30094	32326	3.86125e-05
107	pmn001319	413.12	398.1	414.131	C22H22O8	[M-H]-	1-O-Feruloyl-3-O-p-Coumaroylglycerol	Phenolic acids	Phenolic acids	-	B	28219	30879	26626	3.68718e-05
108	Lmhn004756	455.1	233.04	456.106	C23H20O10	[M-H]-	Cinnamoylferuloyltartaric acid	Phenolic acids	Phenolic acids	-	B	26876	26943	26923	3.47232e-05
109	pmn001419	325.09	163.04	326.1	C15H18O8	[M-H]-	1-O-[(E)-p-Cumaroyl]-D-glucose	Phenolic acids	Phenolic acids	-	B	19053	28385	27678	3.23145e-05
110	Lmhn002573	399.09	205.04	400.101	C17H20O11	[M-H]-	Sinapoylglucuronic acid	Phenolic acids	Phenolic acids	-	B	15454	23978	30556	3.01027e-05
111	mws1153	665.21	161.02	666.216	C31H38O16	[M-H]-	2'-Acetylacteoside	Phenolic acids	Phenolic acids	94492-24-7	B	26712	21720	20268	2.954e-05
112	pme0221	153.05	121	152.047	C8H8O3	[M+H]+	Methyl salicylate	Phenolic acids	Phenolic acids	119-36-8	B	24367	23327	20589	2.93661e-05
113	Lmhn003223	279.05	147.04	280.058	C13H12O7	[M-H]-	Cinnamoyltartaric acid	Phenolic acids	Phenolic acids	-	B	20502	20939	18203	2.56525e-05
114	Xmyn004302	449.24	259.06	450.21	C20H34O11	[M-H]-	Ginkgoside A	Phenolic acids	Phenolic acids	-	B	16022	24862	17852	2.52746e-05
115	Lmhn001477	311.04	179.04	312.048	C13H12O9	[M-H]-	2-Caffeoyl-L-tartaric acid (Caftaric acid)	Phenolic acids	Phenolic acids	67879-58-7	B	17863	16257	22466	2.43282e-05
116	Zmhn002301	325.09	163.04	326.1	C15H18O8	[M-H]-	p-Coumaric acid-4-O-glucoside	Phenolic acids	Phenolic acids	117405-48-8	B	17951	12115	20055	2.15419e-05
117	Lmlp001436	183.07	165.06	182.058	C9H10O4	[M+H]+	Dihydrocaffeic acid	Phenolic acids	Phenolic acids	1078-61-1	B	11845	15237	13835	1.76012e-05
118	mws2105	229.09	211.1	228.079	C14H12O3	[M+H]+	Benzyl salicylate	Phenolic acids	Phenolic acids	118-58-1	B	14886	10663	10741	1.56018e-05
119	pmb2620	207.07	133.1	208.074	C11H12O4	[M-H]-	3,4-Dimethoxycinnamic acid	Phenolic acids	Phenolic acids	14737-89-4	B	12222	11449	12125	1.53927e-05
120	Lmhn002926	279.05	163.04	280.058	C13H12O7	[M-H]-	p-Coumaroylmalic acid	Phenolic acids	Phenolic acids	-	B	12738	10384	12363	1.52562e-05
121	Lmhn003801	531.12	337.06	532.122	C25H24O13	[M-H]-	Feruloylsinapoyltartaric acid	Phenolic acids	Phenolic acids	-	B	6804.1	8215.6	8050.3	9.92294e-06
122	Lmhn004093	429.08	193.05	430.09	C21H18O10	[M-H]-	Benzoylferuloyltartaric acid	Phenolic acids	Phenolic acids	-	B	8497.7	7180	5659.2	9.17565e-06
123	Hmbn005951	383.12	163.04	384.121	C21H20O7	[M-H]-	1,3-O-Di-p-Coumaroylglycerol	Phenolic acids	Phenolic acids	-	B	5537	5102	4676.7	6.58636e-06
124	pmn001669	237.08	147	238.084	C12H14O5	[M-H]-	Methyl sinapate	Phenolic acids	Phenolic acids	20733-94-2	B	5585.9	5018.4	4405.5	6.45481e-06
125	Hmpn005518	317.18	177.05	316.168	C19H24O4	[M-H]-	1,7-Diphenylheptane-1,3,5,7-tetraol	Phenolic acids	Phenolic acids	-	B	5772.7	4280.2	2955.9	5.59381e-06
126	Lmhn003799	501.1	307.05	502.111	C24H22O12	[M-H]-	Feruloylferuloyltartaric acid	Phenolic acids	Phenolic acids	-	B	2720.1	3711.8	5291.2	5.04139e-06
127	mws1297	269.1	101.02	270.11	C13H18O6	[M-H]-	Benzyl glucoside	Phenolic acids	Phenolic acids	4304-12-5	B	4317.7	3068.8	3418.4	4.64499e-06
128	mws0160	181.05	108	182.058	C9H10O4	[M-H]-	3,4-Dihydroxybenzoic Acid Ethyl Ester (Protocatechuic acid ethyl ester)	Phenolic acids	Phenolic acids	3943-89-3	B	3045.1	2870.9	3549	4.0697e-06
129	mws2213	147.05	77.01	148.052	C9H8O2	[M-H]-	Cinnamic acid	Phenolic acids	Phenolic acids	140-10-3	A	403.39	592.37	528.89	6.55934e-07
130	mws1500	177.09	130.9	176.084	C11H12O2	[M+H]+	Ethyl cinnamate	Phenolic acids	Phenolic acids	103-36-6	B	9	9	9	1.16113e-08
131	mws1195	179.07	147.1	178.063	C10H10O3	[M+H]+	p-Coumaric acid methyl ester	Phenolic acids	Phenolic acids	3943-97-3	B	9	9	9	1.16113e-08
132	mws4171	183.03	107.01	184.037	C8H8O5	[M-H]-	2,4,6-Trihydroxybenzoic acid methyl ester	Phenolic acids	Phenolic acids	3147-39-5	B	9	9	9	1.16113e-08
133	pme0422	193.06	134	194.058	C10H10O4	[M-H]-	Isoferulic Acid	Phenolic acids	Phenolic acids	537-73-5	B	9	9	9	1.16113e-08
134	pmn001320	237.08	163.04	238.084	C12H14O5	[M-H]-	1-O-p-Cumaroylglycerol	Phenolic acids	Phenolic acids	106055-11-2	B	9	9	9	1.16113e-08
135	Hmjp003400	293.12	107.04	292.11	C19H16O3	[M+H]+	1,7-Bis-(4-hydroxyphenyl)-2,4,6-heptatrienone	Phenolic acids	Phenolic acids	-	B	9	9	9	1.16113e-08
136	Lmtn003441	311.11	149.06	312.121	C15H20O7	[M-H]-	2-Acetyl-3-hydroxyphenyl-1-O-glucoside	Phenolic acids	Phenolic acids	-	B	9	9	9	1.16113e-08
137	Cmzp002057	315.12	255.1	314.1	C14H18O8	[M+H]+	6-O-Acetylarbutin	Phenolic acids	Phenolic acids	10338-88-2	B	9	9	9	1.16113e-08
138	Hmjp003498	323.13	107.04	322.121	C20H18O4	[M+H]+	1-(4-Hydroxyphenyl)-7-(3-methoxy-4-hydroxyphenyl)-1,4,6-heptatriene-3-one	Phenolic acids	Phenolic acids	-	B	9	9	9	1.16113e-08
139	Lmtn002565	329.11	167.03	330.095	C14H18O9	[M-H]-	1-O-Vanilloyl-D-Glucose	Phenolic acids	Phenolic acids	-	B	9	9	9	1.16113e-08
140	mws0906	341.12	179	342.131	C16H22O8	[M-H]-	Coniferin	Phenolic acids	Phenolic acids	531-29-3	B	9	9	9	1.16113e-08
141	pmb2940	385.11	205	386.121	C17H22O10	[M-H]-	1-O-Glucosyl sinapate	Phenolic acids	Phenolic acids	78185-48-5	B	9	9	9	1.16113e-08
142	Lmhn003494	415.07	179.03	416.074	C20H16O10	[M-H]-	Caffeoylbenzoyltartaric acid	Phenolic acids	Phenolic acids	-	B	9	9	9	1.16113e-08
143	mad2085	457.08	295.04	458.085	C22H18O11	[M-H]-	Caffeoyl-p-coumaroyltartaric acid	Phenolic acids	Phenolic acids	-	B	9	9	9	1.16113e-08
144	Zmhn003625	459.13	337.09	460.137	C23H24O10	[M-H]-	6-O-Glucosyl-feruloylbenzoic acid	Phenolic acids	Phenolic acids	-	B	9	9	9	1.16113e-08
145	Zmhn002508	471.15	309.1	472.158	C21H28O12	[M-H]-	4-p-Cumaroyl-rhamnosyl-(1→6)-D-glucose	Phenolic acids	Phenolic acids	-	B	9	9	9	1.16113e-08
146	pmn001564	505.17	59	506.179	C25H30O11	[M-H]-	Shomaside E	Phenolic acids	Phenolic acids	-	B	9	9	9	1.16113e-08
147	Wmzn002116	515.12	353.09	516.127	C25H24O12	[M-H]-	3,5-Dicaffeoylquinic acid	Phenolic acids	Phenolic acids	-	B	9	9	9	1.16113e-08

## Sheet: Flavonoids
Index	Q1 (Da)	Q3 (Da)	Molecular Weight (Da)	Formula	Ionization model	Compounds	Class I	Class II	CAS	Level	Underground-part1	Underground-part2	Underground-part3	Ud-Content
Hmdp001950	303.12	285.12	302.115	C17H18O5	[M+H]+	2',7-Dihydroxy-3',4'-dimethoxyisoflavan	Flavonoids	Isoflavones	52250-35-8	B	14603000	14812000	15947000	0.0195073
Lmsp004632	287.06	269.04	286.048	C15H10O6	[M+H]+	Scutellarein (5,6,7,4'-Tetrahydroxyflavone)	Flavonoids	Flavonoid	529-53-3	B	4883000	4938800	4952600	0.00635378
pmp001224	357.13	147	356.126	C20H20O6	[M+H]+	Brosimacutin G	Flavonoids	Chalcones	350221-50-0	B	4523800	4285500	4485600	0.00571705
Hmln001836	651.16	489.12	652.164	C29H32O17	[M-H]-	Kaempferol-3-O-(6''-Acetyl)glucosyl-(1→3)-Galactoside	Flavonoids	Flavonols	-	B	1259400	1268800	1239500	0.00162033
pme2954	303.05	137.02	302.043	C15H10O7	[M+H]+	Quercetin	Flavonoids	Flavonols	117-39-5	A	673570	673210	659490	0.000862806
pmb2979	549.12	387.1	550.132	C25H26O14	[M-H]-	Hesperetin-7-O-(6''-malonyl)glucoside	Flavonoids	Dihydroflavonol	-	B	465480	444220	416620	0.000570382
Wmkn004187	441.19	279.16	442.199	C25H30O7	[M-H]-	Norkurarinol	Flavonoids	Flavonols	52483-01-9	B	378170	439900	426070	0.000535121
Lmsn003588	297.08	282.05	298.084	C17H14O5	[M-H]-	Pterocarpine	Flavonoids	Isoflavones	524-97-0	B	411730	423470	391600	0.000527623
mws0043	403.14	373.1	402.131	C21H22O8	[M+H]+	Nobiletin (5,6,7,8,3',4'-Hexamethoxyflavone)	Flavonoids	Flavonoid	478-01-3	B	346620	334200	362460	0.000448627
Zmsp007375	373.13	343.08	372.121	C20H20O7	[M+H]+	3,5,7,3′4′-Pentamethoxyflavone	Flavonoids	Flavonoid	1247-97-8	B	294920	282200	296250	0.000375568
pme1540	625.18	317.06	624.169	C28H32O16	[M+H]+	Isorhamnetin-3-O-neohesperidoside	Flavonoids	Flavonols	55033-90-4	A	242510	300750	279130	0.00035375
mws1073	595.17	457.2	594.158	C27H30O15	[M+H]+	Apigenin-6,8-di-C-glucoside (Vicenin-2)	Flavonoids	Flavonoid	23666-13-9	A	228880	233180	228320	0.000296906
pmp001225	339.12	119	338.115	C20H18O5	[M+H]+	Wighteone	Flavonoids	Isoflavones	51225-30-0	B	210110	193610	204760	0.00026165
HJAP127	757.22	303.05	756.212	C33H40O20	[M+H]+	Quercetin-3-O-(2''-O-Rhamnosyl)rutinoside	Flavonoids	Flavonols	55696-57-6	B	133490	120290	116190	0.000159094
pme0001	609.18	301	610.19	C28H34O15	[M-H]-	Hesperetin-7-O-neohesperidoside(Neohesperidin)	Flavonoids	Dihydroflavone	13241-33-3	B	112180	108560	109140	0.00014186
Zmap009745	345.1	330.07	344.09	C18H16O7	[M+H]+	Ayanin	Flavonoids	Flavonoid	572-32-7	A	113350	112840	102260	0.000141257
Lmjp006533	345.1	330.07	344.09	C18H16O7	[M+H]+	Pachypodol (5,4'-dihydroxy-3,7,3'-trimethoxyflavone)	Flavonoids	Flavonoid	33708-72-4	B	105720	109640	107300	0.000138766
mws0036	609.18	301.09	610.19	C28H34O15	[M-H]-	Hesperetin-7-O-rutinoside (Hesperidin)	Flavonoids	Dihydroflavone	520-26-3	B	95525	99821	88771	0.000122198
Lmsp004166	611.16	303.05	610.153	C27H30O16	[M+H]+	Quercetin-3-O-glucoside-7-O-rhamnoside	Flavonoids	Flavonols	-	A	86259	95127	101990	0.00012187
pmp001106	595.17	577.16	594.158	C27H30O15	[M+H]+	Vitexin-2''-O-glucoside	Flavonoids	Flavonoid carbonoside	61360-94-9	A	101170	71107	67343	0.000103018
pme2459	449.11	287.2	448.101	C21H20O11	[M+H]+	Luteolin-7-O-glucoside (Cynaroside)*	Flavonoids	Flavonoid	5373-11-5	A	75763	80617	69168	9.70111e-05
pmn001642	503.08	459.1	504.09	C23H20O13	[M-H]-	Kaempferol-3-O-(2''-O-acetyl)glucuronide	Flavonoids	Flavonols	-	B	63872	68835	84030	9.32014e-05
mws0988	315.05	165	316.058	C16H12O7	[M-H]-	Rhamnetin	Flavonoids	Flavonols	90-19-7	B	67369	66695	72823	8.89662e-05
Lmsp004721	625.18	317.07	624.169	C28H32O16	[M+H]+	Tamarixetin-3-O-glucoside-7-O-rhamnoside	Flavonoids	Flavonoid	-	A	60598	60004	61418	7.82759e-05
Lmmp002463	625.18	317.07	624.169	C28H32O16	[M+H]+	Sexangularetin-3-O-glucoside-7-O-rhamnoside	Flavonoids	Flavonols	-	A	59361	59093	63003	7.80322e-05
Lmhp003217	625.17	317.06	624.169	C28H32O16	[M+H]+	2'-Hydoxy,5-methoxyGenistein-O-rhamnosyl-glucoside	Flavonoids	Isoflavones	-	A	61997	59435	59312	7.77262e-05
Hmcp002207	479.12	317.06	478.111	C22H22O12	[M+H]+	Isorhamnetin-7-O-glucoside (Brassicin)	Flavonoids	Flavonols	6743-96-0	B	53013	39455	44087	5.87069e-05
Zmjp010694	359.11	344.09	358.105	C19H18O7	[M+H]+	5-Hydroxy-3,7,3',4'-tetramethoxyflavone (Retusin)	Flavonoids	Flavonoid	1245-15-4	A	43484	41754	43931	5.55455e-05
Hmyp008708	285.08	242.06	284.068	C16H12O5	[M+H]+	Izalpinin	Flavonoids	Flavonols	480-14-8	B	44343	37009	42382	5.31995e-05
Lmtn002796	449.1	287.05	450.116	C21H22O11	[M-H]-	Aromadendrin-7-O-glucoside	Flavonoids	Flavonoid	28189-90-4	B	26444	33374	31486	3.92744e-05
mws1661	609.18	301	608.174	C28H32O15	[M+H]+	Diosmetin-7-O-rutinoside (Diosmin)	Flavonoids	Flavonoid	520-27-4	B	32513	24555	31419	3.80397e-05
mws0091	463.09	300.03	464.095	C21H20O12	[M-H]-	Quercetin-3-O-glucoside (Isoquercitrin)*	Flavonoids	Flavonols	482-35-9	A	21664	19842	15863	2.46726e-05
mws1329	463.09	300.7	464.095	C21H20O12	[M-H]-	Quercetin-7-O-glucoside*	Flavonoids	Flavonols	491-50-9	A	19916	18829	12516	2.20485e-05
mws0856	463.09	301	464.095	C21H20O12	[M-H]-	Quercetin-4'-O-glucoside (Spiraeoside)*	Flavonoids	Flavonols	20229-56-5	A	27156	9636.2	14206	2.19088e-05
pmb0672	771.21	463.1	770.206	C37H38O18	[M+H]+	Isovitexin-7-O-(6''-feruloyl)glucoside	Flavonoids	Flavonoid carbonoside	-	B	17650	13109	18403	2.1133e-05
mws0917	329.07	314	330.074	C17H14O7	[M-H]-	3,7-Di-O-methylquercetin	Flavonoids	Flavonols	2068-02-2	B	14037	13296	13570	1.75893e-05
pmp000004	331.08	316.06	330.074	C17H14O7	[M+H]+	4',5,7-Trihydroxy-3',6-dimethoxyflavone (Jaceosidin)	Flavonoids	Flavonoid	18085-97-7	B	11959	14984	12962	1.71661e-05
pme0460	291.09	139.04	290.079	C15H14O6	[M+H]+	Epicatechin	Flavonoids	Flavanols	490-46-0	B	12298	9740.3	8317.1	1.30526e-05
Lmtp002822	535.14	499.12	534.137	C25H26O13	[M+H]+	Apigenin-6-C-arabinoside-8-C-xyloside	Flavonoids	Flavonoid carbonoside	-	A	6904.2	9867.6	8917.7	1.10518e-05
pmp001079	595.17	449.1	594.158	C27H30O15	[M+H]+	Luteolin-7-O-neohesperidoside (Lonicerin)	Flavonoids	Flavonoid	25694-72-8	B	5193.2	6479.1	7785.5	8.36823e-06
Lmjp007790	329.1	314.08	328.095	C18H16O6	[M+H]+	5-Hydroxy-3,7,4'-trimethoxyflavone	Flavonoids	Flavonoid	-	B	6350.5	6242.5	5879.9	7.94443e-06
Hmhn006723	301.07	179.03	302.079	C16H14O6	[M-H]-	Disporopsin	Flavonoids	Flavonoid	-	B	4236.4	5380	5067.4	6.31627e-06
pme1665	593.15	311	594.158	C27H30O15	[M-H]-	Isovitexin-7-O-glucoside(Saponarin)	Flavonoids	Flavonoid carbonoside	20310-89-8	A	4249.8	4799.9	5042.7	6.06085e-06
pmp000003	317.07	302.04	316.058	C16H12O7	[M+H]+	Nepetin (5,7,3',4'-Tetrahydroxy-6-methoxyflavone)	Flavonoids	Flavonoid	520-11-6	B	4093.3	3456.7	6082.9	5.86009e-06
Lmjp002867	595.17	287.05	594.158	C27H30O15	[M+H]+	Kaempferol-3-O-neohesperidoside	Flavonoids	Flavonols	32602-81-6	A	1802.2	1213.4	1386.4	1.89229e-06
Lmsp004670	595.17	287.06	594.158	C27H30O15	[M+H]+	Kaempferol-3-O-glucoside-7-O-rhamnoside	Flavonoids	Flavonols	-	A	1565.6	787.6	1395.2	1.61067e-06
mws0038	313.07	283	314.079	C17H14O6	[M-H]-	Kumatakenin	Flavonoids	Flavonols	3301-49-3	B	1295.4	928.25	1243.5	1.4904e-06
mws0047	579.17	271.07	578.164	C27H30O14	[M+H]+	Apigenin-7-O-neohesperidoside (Rhoifolin)	Flavonoids	Flavonoid	17306-46-6	A	2241.9	9	9	9.69398e-07
mws1068	285.04	151	286.048	C15H10O6	[M-H]-	Kaempferol (3,5,7,4'-Tetrahydroxyflavone)	Flavonoids	Flavonols	520-18-3	A	9	9	9	1.16113e-08
Cmxn006627	285.04	185.06	286.048	C15H10O6	[M-H]-	Maritimetin	Flavonoids	Sinensetin	576-02-3	A	9	9	9	1.16113e-08
mws0744	319.05	301	320.053	C15H12O8	[M-H]-	Dihydromyricetin (Ampelopsin)	Flavonoids	Dihydroflavonol	27200-12-0	B	9	9	9	1.16113e-08
pmb0681	403.1	367.08	402.095	C20H18O9	[M+H]+	Apigenin-8-C-Arabinoside	Flavonoids	Flavonoid	-	A	9	9	9	1.16113e-08
mws0919	431.1	285	432.106	C21H20O10	[M-H]-	Kaempferol-3-O-rhamnoside (Afzelin)(Kaempferin)*	Flavonoids	Flavonols	482-39-3	A	9	9	9	1.16113e-08
pme0321	431.1	285	432.106	C21H20O10	[M-H]-	Kaempferol-7-O-rhamnoside*	Flavonoids	Flavonols	20196-89-8	A	9	9	9	1.16113e-08
Lmdp003509	435.09	303.06	434.085	C20H18O11	[M+H]+	Quercetin-3-O-xyloside (Reynoutrin)	Flavonoids	Flavonols	549-32-6	B	9	9	9	1.16113e-08
mws2186	435.09	303	434.085	C20H18O11	[M+H]+	Avicularin(Quercetin-3-O-α-L-arabinofuranoside)	Flavonoids	Flavonols	572-30-5	B	9	9	9	1.16113e-08
mws0045	449.11	303.05	448.101	C21H20O11	[M+H]+	Quercetin-3-O-rhamnoside(Quercitrin)	Flavonoids	Flavonols	522-12-3	B	9	9	9	1.16113e-08
mws0089	447.09	285.04	448.101	C21H20O11	[M-H]-	Kaempferol-7-O-glucoside*	Flavonoids	Flavonols	16290-07-6	A	9	9	9	1.16113e-08
mws0913	447.09	285	448.101	C21H20O11	[M-H]-	Kaempferol-3-O-galactoside (Trifolin)*	Flavonoids	Flavonols	23627-87-4	A	9	9	9	1.16113e-08
Xmyp005654	449.11	287.06	448.101	C21H20O11	[M+H]+	Kaempferol-4'-O-glucoside*	Flavonoids	Flavonoid	-	A	9	9	9	1.16113e-08
Lmlp003531	449.11	287.06	448.101	C21H20O11	[M+H]+	Luteolin-3'-O-glucoside*	Flavonoids	Flavonoid	5154-41-6	A	9	9	9	1.16113e-08
mws2209	449.11	287.06	448.101	C21H20O11	[M+H]+	Kaempferol-3-O-glucoside (Astragalin)	Flavonoids	Flavonols	480-10-4	A	9	9	9	1.16113e-08
Lmyn006922	447.13	285.08	448.137	C22H24O10	[M-H]-	Sakuranin	Flavonoids	Flavonoid	529-39-5	B	9	9	9	1.16113e-08
pme1598	463.12	301	464.132	C22H24O11	[M-H]-	Hesperetin-5-O-glucoside	Flavonoids	Dihydroflavonol	69651-80-5	B	9	9	9	1.16113e-08
HJAP154	469.13	317.08	468.069	C23H16O11	[M+H]+	Galloylisorhamnetin	Flavonoids	Flavonols	-	B	9	9	9	1.16113e-08
Hmln002199	505.1	300.03	506.107	C23H22O13	[M-H]-	Quercetin-3-O-(6''-acetyl)galactoside	Flavonoids	Flavonols	-	B	9	9	9	1.16113e-08
Li512111	519.11	315.05	520.122	C24H24O13	[M-H]-	Isorhamnetin-3-O-(6''-acetylglucoside)	Flavonoids	Flavonols	-	B	9	9	9	1.16113e-08
Hmln002189	549.09	505.11	550.096	C24H22O15	[M-H]-	Quercetin-3-O-(6''-malonyl)galactoside	Flavonoids	Flavonols	-	B	9	9	9	1.16113e-08
mws1660	565.16	529.13	564.123	C26H28O14	[M+H]+	Schaftoside	Flavonoids	Flavonoid carbonoside	51938-32-0	A	9	9	9	1.16113e-08
Lmpp003930	579.15	271.06	578.142	C30H26O12	[M+H]+	Apigenin-7-O-(6''-p-Coumaryl)glucoside	Flavonoids	Flavonoid	-	A	9	9	9	1.16113e-08
mws1066	579.17	271	580.179	C27H32O14	[M-H]-	Naringenin-7-O-Rutinoside(Narirutin)	Flavonoids	Dihydroflavone	14259-46-2	A	9	9	9	1.16113e-08
mws0046	579.17	271.06	580.179	C27H32O14	[M-H]-	Naringenin-7-O-Neohesperidoside(Naringin)	Flavonoids	Dihydroflavone	10236-47-2	A	9	9	9	1.16113e-08
pme1605	593.15	285	594.158	C27H30O15	[M-H]-	Kaempferol-3-O-robinobioside(Biorobin)	Flavonoids	Flavonols	17297-56-2	A	9	9	9	1.16113e-08
Zmcp003989	595.16	287.05	594.158	C27H30O15	[M+H]+	Kaempferol-3-O-rhamnosyl(1→2)glucoside	Flavonoids	Flavonoid	-	A	9	9	9	1.16113e-08
Lmsn002815	593.15	285.04	594.158	C27H30O15	[M-H]-	Kaempferol-3-O-rutinoside(Nicotiflorin)	Flavonoids	Flavonoid	17650-84-9	B	9	9	9	1.16113e-08
Lmln001951	595.13	300.03	596.138	C26H28O16	[M-H]-	Quercetin-3-O-(6''-O-arabinosyl)glucoside	Flavonoids	Flavonols	-	B	9	9	9	1.16113e-08
pmp001080	609.18	463.12	608.174	C28H32O15	[M+H]+	Diosmetin-7-O-Neohesperidoside (Neodiosmin)	Flavonoids	Flavonoid	38665-01-9	B	9	9	9	1.16113e-08
mws0059	609.15	301	610.153	C27H30O16	[M-H]-	Quercetin-3-O-rutinoside (Rutin)*	Flavonoids	Flavonols	153-18-4	A	9	9	9	1.16113e-08
pmn001583	609.15	300	610.153	C27H30O16	[M-H]-	Quercetin-3-O-robinobioside*	Flavonoids	Flavonols	52525-35-6	A	9	9	9	1.16113e-08
pmp001310	627.16	303.1	626.148	C27H30O17	[M+H]+	6-Hydroxykaempferol-3,6-O-Diglucoside	Flavonoids	Flavonols	-	B	9	9	9	1.16113e-08
pmb0680	741.2	147.3	740.195	C36H36O17	[M+H]+	Vitexin-7-O-(6''-p-coumaroyl)glucoside	Flavonoids	Flavonoid carbonoside	-	B	9	9	9	1.16113e-08
Zmlp003063	741.23	433.12	740.209	C33H40O19	[M+H]+	Luteolin-7-O-(2''-O-rhamnosyl)rutinoside	Flavonoids	Flavonoid	-	B	9	9	9	1.16113e-08
mws1035	741.22	433	740.216	C33H40O19	[M+H]+	Kaempferol-3-O-robinoside-7-O-rhamnoside (Robinin)	Flavonoids	Flavonols	301-19-9	B	9	9	9	1.16113e-08
pmb2991	739.21	269.2	740.216	C33H40O19	[M-H]-	Apigenin-7-O-glucoside-4'-O-rutinoside	Flavonoids	Flavonoid	-	B	9	9	9	1.16113e-08

## Sheet: Quinones
Index	Q1 (Da)	Q3 (Da)	Molecular Weight (Da)	Formula	Ionization model	Compounds	Class I	Class II	CAS	Level	Underground-part1	Underground-part2	Underground-part3	Ud-Content
Wmhn001652	203.08	116.05	204.042	C11H8O4	[M-H]-	3-Methoxy-juglone	Quinones	Quinones	-	B	30215000	30978000	30261000	0.0393312
Wmhn005209	531.09	369.05	532.158	C26H28O12	[M-H]-	4,5,8-Trihydroxy-α-tetralone 5-O-D-[6'-O-(4''-propionyloxybenzoyl)]glucoside	Quinones	Quinones	-	B	9	9	9	1.16113e-08

## Sheet: Lignans and Coumarins
Index	Q1 (Da)	Q3 (Da)	Molecular Weight (Da)	Formula	Ionization model	Compounds	Class I	Class II	CAS	Level	Underground-part1	Underground-part2	Underground-part3	Ud-Content
Hmqn000843	301.09	123.01	302.1	C13H18O8	[M-H]-	Tachioside	Lignans and Coumarins	Lignans	109194-60-7	B	4279200	4212200	4317600	0.00550835
mws0097	357.13	151	358.142	C20H22O6	[M-H]-	Pinoresinol*	Lignans and Coumarins	Lignans	487-36-5	B	2697900	2502600	2670800	0.0033847
Lmdn004267	357.13	151.04	358.142	C20H22O6	[M-H]-	Epipinoresinol*	Lignans and Coumarins	Lignans	24404-50-0	B	2491500	2456300	2549600	0.00322414
pmn001375	535.18	373.13	536.189	C26H32O12	[M-H]-	1-Hydroxypinoresinol-1-O-Glucoside	Lignans and Coumarins	Lignans	81495-71-8	B	1364300	1289700	1249700	0.00167873
Hmlp003129	359.15	137.06	358.142	C20H22O6	[M+H]+	Matairesinol	Lignans and Coumarins	Lignans	580-72-3	B	1084100	1043500	1125400	0.00139884
pmn001501	369.13	204	370.142	C21H22O6	[M-H]-	Fargesin	Lignans and Coumarins	Lignans	31008-19-2	A	1046800	1001500	1002400	0.0013119
Cmpp003619	193.05	105.07	192.042	C10H8O4	[M+H]+	6,7-Dihydroxy-4-methylcoumarin	Lignans and Coumarins	Coumarins	529-84-0	B	869920	814930	833390	0.00108289
pme2993	193.05	133	192.042	C10H8O4	[M+H]+	Scopoletin (7-Hydroxy-5-methoxycoumarin)	Lignans and Coumarins	Coumarins	92-61-5	B	550760	477920	414510	0.000620612
pmn001371	549.2	387.15	550.205	C27H34O12	[M-H]-	Eucommin A	Lignans and Coumarins	Lignans	99633-12-2	B	501690	418980	495420	0.000608838
Hmln002355	549.2	387.15	550.204	C27H34O12	[M-H]-	5'-Methoxymatairesinoside	Lignans and Coumarins	Lignans	1691201-82-7	B	431370	449070	483820	0.000586692
pmn001492	187.1	123.1	188.041	C11H8O3	[M-H]-	Ayapin	Lignans and Coumarins	Coumarins	494-56-4	B	359610	358960	364460	0.000465752
Lmtn003096	523.21	361.14	524.226	C26H36O11	[M-H]-	Secoisolariciresinol 4-O-glucoside	Lignans and Coumarins	Lignans	-	B	285980	304800	278290	0.000373785
Hmhp002580	413.14	136.07	412.133	C19H24O10	[M+H]+	Methylpicraquassioside A	Lignans and Coumarins	Coumarins	-	A	180730	183370	186540	0.000236803
Hmlp002744	375.14	137.06	374.136	C20H22O7	[M+H]+	Nortrachelogenin	Lignans and Coumarins	Lignans	34444-37-6	B	175860	173550	190630	0.000232228
Cmsp005051	523.23	137.06	522.21	C26H34O11	[M+H]+	Isolariciresinol-9-O-glucoside	Lignans and Coumarins	Lignans	-	B	43396	35448	31664	4.75181e-05
mws1075	177.05	121	176.047	C10H8O3	[M+H]+	7-Methoxycoumarin	Lignans and Coumarins	Coumarins	531-59-9	B	37933	40528	30812	4.70032e-05
Hmgn004139	373.13	329.05	374.136	C20H22O7	[M-H]-	Isohydroxymatairesinol	Lignans and Coumarins	Lignans	-	B	30111	29833	30102	3.87237e-05
pme2996	161.02	116.6	162.032	C9H6O3	[M-H]-	4-Hydroxycoumarin	Lignans and Coumarins	Coumarins	1076-38-6	B	25990	23275	26925	3.27597e-05
pmn001369	697.23	535.18	698.242	C32H42O17	[M-H]-	1-Hydroxypineolin Diglucoside	Lignans and Coumarins	Lignans	-	B	15537	18800	8714.7	1.85258e-05
mws0987	161.06	115	160.052	C10H8O2	[M+H]+	6-MethylCoumarin	Lignans and Coumarins	Coumarins	92-48-8	B	11691	11713	15022	1.65226e-05
pmb2723	485.13	323.2	486.137	C21H26O13	[M-H]-	4-Hydroxycoumarin di-glucoside	Lignans and Coumarins	Coumarins	-	B	8300.2	8524	9883.2	1.14847e-05
pme3131	221.08	177	220.074	C12H12O4	[M+H]+	6,7-Dimethoxy-4-methylcoumarin	Lignans and Coumarins	Coumarins	4281-40-7	B	9780.6	7294.5	8271.3	1.08967e-05
mws1012	147.04	103	146.037	C9H6O2	[M+H]+	Coumarin	Lignans and Coumarins	Coumarins	91-64-5	B	9	9	9	1.16113e-08
pme2987	147.05	119	148.052	C9H8O2	[M-H]-	3,4-Dihydrocoumarin	Lignans and Coumarins	Coumarins	119-84-6	B	9	9	9	1.16113e-08
pme3140	175.04	131	176.047	C10H8O3	[M-H]-	6-Hydroxy-4-methylcoumarin	Lignans and Coumarins	Coumarins	2373-31-1	B	9	9	9	1.16113e-08
Hmcp002123	193.05	178.02	192.042	C10H8O4	[M+H]+	Isoscopoletin (6-Hydroxy-7-Methoxycoumarin)	Lignans and Coumarins	Coumarins	776-86-3	B	9	9	9	1.16113e-08
mws1014	209.04	149.1	208.037	C10H8O5	[M+H]+	Fraxetin (7,8-Dihydroxy-6-methoxycoumarin)	Lignans and Coumarins	Coumarins	574-84-5	B	9	9	9	1.16113e-08
pmb2601	307.1	161.1	308.09	C15H16O7	[M-H]-	7-Hydroxycoumarin-O-rhamnoside	Lignans and Coumarins	Coumarins	-	B	9	9	9	1.16113e-08
pmb4777	337.09	161.1	338.1	C16H18O8	[M-H]-	4-Hydroxy-7-methoxycoumarin-β-rhamnoside	Lignans and Coumarins	Coumarins	-	B	9	9	9	1.16113e-08
mws4108	353.14	189.1	352.131	C21H20O5	[M+H]+	1-Methoxyphaseollin	Lignans and Coumarins	Coumarins	157226-48-7	B	9	9	9	1.16113e-08

## Sheet: Tannins
Index	Q1 (Da)	Q3 (Da)	Molecular Weight (Da)	Formula	Ionization model	Compounds	Class I	Class II	CAS	Level	Underground-part1	Underground-part2	Underground-part3	Ud-Content
Lmfp001509	317.09	153.02	316.079	C13H16O9	[M+H]+	1-O-Galloyl-rhamnose	Tannins	Tannin	-	B	182400	192880	181650	0.000239528
pmn001518	331.07	169.01	332.074	C13H16O10	[M-H]-	1-O-Galloyl-D-glucose	Tannins	Tannin	58511-73-2	B	185500	161120	169630	0.00022198
mws0024	169.01	125	170.022	C7H6O5	[M-H]-	Gallic acid	Tannins	Tannin	149-91-7	B	84977	89312	88009	0.000112807
pme0309	183.03	124	184.037	C8H8O5	[M-H]-	3-O-Methylgallic Acid*	Tannins	Tannin	3934-84-7	B	15387	23633	21561	2.60636e-05
Hmdp001663	637.1	153.01	636.097	C27H24O18	[M+H]+	1,2,6-Tri-O-galloyl-glucose	Tannins	Tannin	-	B	11187	9550.2	9564.6	1.30295e-05
Lmfn000604	331.07	169.01	332.074	C13H16O10	[M-H]-	6-O-Galloyl-D-glucose	Tannins	Tannin	13186-19-1	B	9	9	9	1.16113e-08
Hmln000873	331.07	169.01	332.075	C13H16O10	[M-H]-	2-O-Galloyl-D-glucose	Tannins	Tannin	-	B	9	9	9	1.16113e-08

## Sheet: Alkaloids
Index	Q1 (Da)	Q3 (Da)	Molecular Weight (Da)	Formula	Ionization model	Compounds	Class I	Class II	CAS	Level	Underground-part1	Underground-part2	Underground-part3	Ud-Content
pmp001198	132.1	57.1	131.095	C6H13NO2	[M+H]+	6-Deoxyfagomine	Alkaloids	Alkaloids	197449-09-5	A	59018000	58252000	57973000	0.0753626
Lmgp000796	150.06	61.01	149.048	C8H7NO2	[M+H]+	4-Hydroxymandelonitrile	Alkaloids	Alkaloids	13093-65-7	B	44426000	45013000	45847000	0.0581797
Zmbp002538	205.1	146.06	204.09	C11H12N2O2	[M+H]+	1-Methoxy-indole-3-acetamide	Alkaloids	Alkaloids	-	A	11400000	11029000	11414000	0.0145535
pmb0484	104.1	60.1	103.091	C5H13NO	[M+H]+	Choline	Alkaloids	Alkaloids	62-49-7	B	9954200	9913000	9976700	0.0128343
Hmcp003783	211.09	193.07	210.079	C13H10N2O	[M+H]+	1-Acetyl-β-carboline	Alkaloids	Alkaloids	-	A	3404500	3146400	3346400	0.00425589
pmp001287	120.08	103.05	119.073	C8H9N	[M+H]+	N-Benzylmethylene isomethylamine	Alkaloids	Alkaloids	-	A	2825300	2890200	2866800	0.00369091
mws0191	118.09	59	117.079	C5H11NO2	[M+H]+	Betaine	Alkaloids	Alkaloids	107-43-7	B	2184000	2019500	2084200	0.00270379
Hmtp000776	168.07	105.03	167.059	C8H9NO3	[M+H]+	4,5,6-Trihydroxy-2-cyclohexen-1-ylideneacetonitrile	Alkaloids	Alkaloids	-	B	1125700	1175700	1212700	0.00151126
pmb0312	176.1	91.2	175.063	C10H9NO2	[M+H]+	5-Methoxyindole-3-carbaldehyde	Alkaloids	Plumerane	10601-19-1	B	712620	715100	743130	0.000933555
pmb1912	474.17	327	473.166	C20H23N7O7	[M+H]+	10-Formyltetrahydrofuran	Alkaloids	Alkaloids	2800-34-2	B	446840	454850	437920	0.000576121
Lmmp002080	193.13	105.03	192.126	C11H16N2O	[M+H]+	N-(4-Aminobutyl)benzamide	Alkaloids	Phenolamine	5692-23-9	B	430890	399300	454660	0.000552472
pma1840	250.14	147	250.144	C14H20NO3+	[M]+	4-Coumaroylcholine	Alkaloids	Alkaloids	-	B	385450	428600	434550	0.000537003
Cmbp003236	314.11	161.06	313.098	C14H19NO5S	[M+H]+	(E)-S-(3-(4-Hydroxy-3,5-dimethoxyphenyl)allyl)cysteine	Alkaloids	Alkaloids	-	B	326950	341830	364780	0.000444481
Lmxp000939	136.06	119.04	135.054	C5H5N5	[M+H]+	Zarzissine	Alkaloids	Alkaloids	160568-14-9	A	334270	342420	315290	0.000426631
pmb2211	343.3	240.7	342.288	C19H38N2O3	[M+H]+	Cocamidopropyl betaine	Alkaloids	Alkaloids	4292-10-8	B	320500	311900	328030	0.000413011
MA10074217	144.05	115.04	145.053	C9H7NO	[M-H]-	4-Hydroxyquinoline	Alkaloids	Quinoline alkaloids	611-36-9	B	295790	296430	286310	0.00037782
pmb1096	118.07	91	117.058	C8H7N	[M+H]+	Indole	Alkaloids	Plumerane	120-72-9	B	272160	287720	298860	0.00036931
pme1691	147.13	87.2	146.118	C7H16NO2	[M+H]+	Acetylcholine	Alkaloids	Alkaloids	60-31-1	B	279680	277240	284390	0.000361797
Zmbp000555	175.12	130.1	174.079	C10H10N2O	[M+H]+	3-Indole acetamide	Alkaloids	Alkaloids	-	B	203850	202150	241140	0.00027827
pmb0819	157	130	156.069	C10H8N2	[M+H]+	3-Indoleacetonitrile	Alkaloids	Plumerane	771-51-7	B	177890	173230	187300	0.000231531
pmc0682	133.1	105.1	132.069	C8H8N2	[M+H]+	4-Aminoindole	Alkaloids	Plumerane	5192-23-4	B	201290	127740	200140	0.000227432
pme2244	190.09	118.07	189.07	C11H11NO2	[M+H]+	3-Indolepropionic acid	Alkaloids	Plumerane	830-96-6	B	114730	114250	123260	0.000151473
pmf0291	96.04	68.05	95.037	C5H5NO	[M+H]+	4-Hydroxypyridine	Alkaloids	Alkaloids	626-64-2	B	90444	100030	99835	0.000124858
Hmcp001824	213.07	167.06	212.058	C12H8N2O2	[M+H]+	Ailanindole	Alkaloids	Alkaloids	159903-51-2	B	93662	76512	104680	0.00011816
mws0983	326.31	62.06	325.298	C20H39NO2	[M+H]+	N-Oleoylethanolamine	Alkaloids	Alkaloids	111-58-0	B	81703	82259	77749	0.000103952
pme2268	138.05	94.07	137.048	C7H7NO2	[M+H]+	Trigonelline	Alkaloids	Alkaloids	535-83-1	A	78303	74626	74783	9.79233e-05
mws2218	195.09	83.06	194.08	C8H10N4O2	[M+H]+	Caffeine	Alkaloids	Alkaloids	58-08-2	B	42989	42036	39260	5.34498e-05
pme2623	158.12	112	159.126	C8H17NO2	[M-H]-	DL-2-Aminooctanoic acid	Alkaloids	Alkaloids	644-90-6	B	19060	16311	24983	2.59455e-05
NK10246260	162.06	116.05	161.048	C9H7NO2	[M+H]+	2,4-Dihydroxyquinoline*	Alkaloids	Quinoline alkaloids	86-95-3	B	19026	18413	20028	2.47117e-05
Hmdp005521	386.19	222.11	386.196	C22H28NO5+	[M]+	9-O-Methylstecepharine	Alkaloids	Alkaloids	-	B	17723	18849	20336	2.44734e-05
mws1640	205.13	101	204.126	C12H16N2O	[M+H]+	N-Methylcytisine	Alkaloids	Alkaloids	486-86-2	B	17420	16727	15785	2.14732e-05
pmb0130	203.12	144	202.111	C12H14N2O	[M+H]+	Acetryptine	Alkaloids	Phenolamine	3551-18-6	B	14286	16156	13145	1.8749e-05
pmp001176	302.14	103.1	301.131	C17H19NO4	[M+H]+	Dihydrocaffeoyltyramine	Alkaloids	Phenolamine	-	B	10286	5412.4	7771	1.00858e-05
Lmyp001840	177.1	80.05	176.095	C10H12N2O	[M+H]+	6-Hydroxy-N-methylmyosmine	Alkaloids	Alkaloids	68104-57-4	B	4581.2	6655.6	3625.6	6.39622e-06
mws1478	163.12	130	162.116	C10H14N2	[M+H]+	Nicotine	Alkaloids	Alkaloids	54-11-5	B	3059.8	5789.7	4996.4	5.95806e-06
NK10264105	114.09	81.06	113.084	C6H11NO	[M+H]+	ε-Caprolactam	Alkaloids	Alkaloids	105-60-2	B	1413.2	1428.4	1686.2	1.947e-06
mws4002	154.09	137	153.079	C8H11NO2	[M+H]+	Dopamine	Alkaloids	Alkaloids	51-61-6	B	9	9	9	1.16113e-08
Lmgp001898	162.06	116.05	161.048	C9H7NO2	[M+H]+	4,6-Dihydroxyquinoline*	Alkaloids	Quinoline alkaloids	3517-61-1	B	9	9	9	1.16113e-08
pmb0813	176.1	133.2	175.063	C10H9NO2	[M+H]+	1-Methoxyindole-3-carbaldehyde	Alkaloids	Plumerane	67282-55-7	B	9	9	9	1.16113e-08
pme2836	178.09	160	177.079	C10H11NO2	[M+H]+	5-Hydroxytryptophol	Alkaloids	Plumerane	154-02-9	B	9	9	9	1.16113e-08
Zmtn001624	188.04	144.05	189.043	C10H7NO3	[M-H]-	N-Acetylisatin	Alkaloids	Plumerane	574-17-4	B	9	9	9	1.16113e-08
mws0597	190.05	146	191.058	C10H9NO3	[M-H]-	5-Hydroxyindole-3-acetic acid	Alkaloids	Plumerane	54-16-0	B	9	9	9	1.16113e-08
mws1433	314.14	177.05	313.131	C18H19NO4	[M+H]+	N-Feruloyltyramine	Alkaloids	Phenolamine	66648-43-9	B	9	9	9	1.16113e-08

## Sheet: Terpenoids
Index	Q1 (Da)	Q3 (Da)	Molecular Weight (Da)	Formula	Ionization model	Compounds	Class I	Class II	CAS	Level	Underground-part1	Underground-part2	Underground-part3	Ud-Content
Hmyp009454	221.19	119.08	220.182	C15H24O	[M+H]+	Nootkatol	Terpenoids	Sesquiterpenoids	50763-67-2	B	22132000	22316000	22670000	0.028864
pmn001706	471.35	471.35	472.355	C30H48O4	[M-H]-	2-Hydroxyoleanolic acid	Terpenoids	Triterpene	26707-60-8	B	5736600	5656400	5446500	0.0072419
Lmzn006284	471.35	471.35	472.355	C30H48O4	[M-H]-	2α-Hydroxyursolic acid	Terpenoids	Triterpene	-	B	5399300	5086700	4779400	0.00656477
mws1482	237.18	135.12	236.178	C15H24O2	[M+H]+	Prehelminthosporol	Terpenoids	Sesquiterpenoids	1619-13-2	B	1129500	1114500	1161200	0.00146435
Hmmn003964	359.13	197.08	360.142	C16H24O9	[M-H]-	7-Deoxyloganic acid	Terpenoids	Monoterpenoids	22487-36-1	B	952000	788950	1003000	0.00117969
mws1574	373.11	123	374.121	C16H22O10	[M-H]-	Geniposidic acid	Terpenoids	Monoterpenoids	27741-01-1	B	867750	817460	834420	0.0010835
Hmjp004204	235.17	137.09	234.161	C15H22O2	[M+H]+	(6S)-2-Methyl-6-[(1R,5S)-(4-methene-5-hydroxyl-2-cyclohexen)-2-hepten-4-one	Terpenoids	Sesquiterpenoids	-	B	725970	741240	718440	0.000939973
mws1526	359.13	197	358.126	C16H22O9	[M+H]+	Sweroside	Terpenoids	Sesquiterpenoids	14215-86-2	B	681870	743630	696540	0.000912688
Lmyp004084	153.13	107.09	152.12	C10H16O	[M+H]+	Perillyl alcohol	Terpenoids	Monoterpenoids	57717-97-2	B	695850	647160	720040	0.000887104
pmp001059	521.19	209.08	520.179	C22H32O14	[M+H]+	Genipin-1-O-(2''-O-apiosyl)glucoside	Terpenoids	Monoterpenoids	-	B	554510	551440	569860	0.000720664
Hmyp009288	221.18	163.15	220.182	C15H24O	[M+H]+	Epinootkatol	Terpenoids	Sesquiterpenoids	-	B	454040	490280	470350	0.000608434
Hmpn004989	249.15	205.16	250.157	C15H22O3	[M-H]-	5-Hydroxylbisabolon-9-one	Terpenoids	Sesquiterpenoids	-	B	463810	469950	458550	0.000598778
Lmmn004145	675.41	397.14	679.419	C38H60O10	[M-H]-	3-O-(2-O-Acetyl-glucosyl)oleanolic acid	Terpenoids	Triterpene	-	B	244550	277580	233600	0.000325072
Lmdn003868	431.23	161.05	432.236	C21H36O9	[M-H]-	Frehmaglutoside G	Terpenoids	Terpene	-	A	121910	132810	135430	0.000167794
mws1629	345.12	183.2	346.126	C15H22O9	[M-H]-	Aucubin	Terpenoids	Sesquiterpenoids	479-98-1	B	72549	70841	67002	9.04801e-05
pme3459	317.21	299	316.204	C20H28O3	[M+H]+	Cafestol	Terpenoids	Ditepenoids	469-83-0	B	65839	54852	67584	8.09456e-05
Hmyp007081	211.13	151.11	210.125	C12H18O3	[M+H]+	Oxyphyllenone B	Terpenoids	Sesquiterpenoids	-	B	7784.2	10074	11516	1.26338e-05
Hmyn008579	249.15	191.11	250.156	C15H22O3	[M-H]-	Oxyphyllol E	Terpenoids	Sesquiterpenoids	-	B	8051	8610.9	8278.9	1.07267e-05
Hmyn009687	251.17	191.14	252.172	C15H24O3	[M-H]-	Oxyphyllol D	Terpenoids	Sesquiterpenoids	-	B	8494.4	8247.5	6789	1.01203e-05
Hmln008119	197.12	153.12	198.125	C11H18O3	[M-H]-	Robinlin	Terpenoids	Terpene	-	A	4727.2	5620.8	6024.1	7.04149e-06
Hmyp006677	211.13	124.09	210.125	C12H18O3	[M+H]+	Oxyphyllenone A	Terpenoids	Sesquiterpenoids	363610-34-8	B	9	9	9	1.16113e-08
Hmyn009418	251.17	163.11	252.172	C15H24O3	[M-H]-	(11S)-Nootkatone-11,12-diol	Terpenoids	Sesquiterpenoids	-	B	9	9	9	1.16113e-08

## Sheet: Others
Index	Q1 (Da)	Q3 (Da)	Molecular Weight (Da)	Formula	Ionization model	Compounds	Class I	Class II	CAS	Level	Underground-part1	Underground-part2	Underground-part3	Ud-Content
Hmpp002596	391.17	137.05	390.168	C21H26O7	[M+H]+	5'-Hydroxyhexahydrocurcumin	Others	Others	-	A	23143000	22938000	23230000	0.0298067
Hmjp004041	371.15	177.05	370.141	C21H22O6	[M+H]+	Dihydrocurcumin	Others	Others	76474-56-1	B	18320000	19247000	18849000	0.024263
Hmpn003185	403.18	179.07	404.184	C22H28O7	[M-H]-	5-Hydroxy-1-(4-hydroxy-3,5-dimethoxyphenyl)-7-(4-hydroxy-3-methoxyphenyl)heptan-3-one	Others	Others	-	B	15189000	15463000	14790000	0.0195431
mws0133	123.06	80.05	122.048	C6H6N2O	[M+H]+	Nicotinamide	Others	Others	98-92-0	A	13627000	13693000	14263000	0.0178824
Hmpn002947	405.19	390.16	406.199	C22H30O7	[M-H]-	3,5-Dihydroxy-meodah	Others	Others	145888-84-2	A	12307000	13088000	12709000	0.0163878
pmp001230	279.16	121	278.152	C16H22O4	[M+H]+	Senkyunolide M	Others	Others	146986-60-9	A	8223200	8061400	8124800	0.010497
mws0851	143.11	143.11	166.097	C8H15NaO2	[M-Na]-	Sodium Valproate	Others	Others	1069-66-5	B	7522100	7267500	7428000	0.00955427
Hmpn003066	469.12	165.05	470.125	C21H26O10S	[M-H]-	1,7-Bis(3,4-dihydroxy-5-methoxyphenyl)-5-oxoheptane-3-sulfonic acid	Others	Others	-	B	6567300	6468100	6772800	0.00851817
Hmjp003948	341.14	177.05	340.131	C20H20O5	[M+H]+	Dihydrodemethoxy curcumin	Others	Others	-	B	5903300	5966100	6002600	0.00768589
pme1383	170.08	134.1	169.074	C8H11NO3	[M+H]+	Pyridoxine	Others	Others	65-23-6	A	5609400	6447300	5499200	0.00755157
mws1080	341.11	179	342.116	C12H22O11	[M-H]-	Galactinol	Others	Others	3687-64-7	A	4765400	4961100	4830000	0.00626034
pmb0764	144.05	113.2	143.04	C6H9NOS	[M+H]+	4-Methyl-5-thiazoleethanol	Others	Others	137-00-8	A	3786100	3721100	3836700	0.00487828
pmp000452	225.15	85	224.141	C13H20O3	[M+H]+	Annuionone D	Others	Others	-	B	3166700	3265600	3111300	0.00410445
Hmpn003163	343.16	179.07	344.163	C20H24O5	[M-H]-	5-Hydroxy-1-(4-hydroxy-3-methoxyphenyl)-7-(4-hydroxyphenyl)heptan-3-one	Others	Others	-	B	2770900	2693200	2646800	0.00348804
mws4170	179.06	59.01	180.063	C6H12O6	[M-H]-	D-Glucose	Others	Others	14431-43-7	A	2759200	2693400	2617200	0.0034704
mws1559	321.21	127	322.214	C19H30O4	[M-H]-	8-Gingerol	Others	Others	23513-08-8	A	2612600	2590400	2519500	0.00332109
Hmpn003034	403.17	179.07	404.184	C22H28O7	[M-H]-	5-Hydroxy-7-(4-hydroxy-3,5-dimethoxyphenyl)-1-(4-hydroxy-3-methoxyphenyl)heptan-3-one	Others	Others	-	B	2434600	2562300	2544900	0.0032435
pme0519	341.11	119.03	342.116	C12H22O11	[M-H]-	D-Sucrose	Others	Others	57-50-1	A	2459000	2329900	2475000	0.00312358
Hmpp002994	357.17	177.09	356.162	C21H24O5	[M+H]+	Gingerenone A	Others	Others	128700-97-0	A	2539300	2291300	2282200	0.00305859
mws5038	341.11	89.02	342.116	C12H22O11	[M-H]-	Isomaltulose	Others	Others	13718-94-0	A	1823100	1832900	2504400	0.00264877
pme2296	369.13	285	368.126	C21H20O6	[M+H]+	Curcumin	Others	Others	458-37-7	B	1870600	1899100	2062200	0.00250791
Hmpn003232	373.17	179.07	374.173	C21H26O6	[M-H]-	5-Hydroxy-1,7-bis(4-hydroxy-3-methoxyphenyl)heptan-3-one	Others	Others	-	A	1669400	1792100	1680300	0.00221145
pmn001394	405.12	243.1	406.126	C20H22O9	[M-H]-	2,3,5,4'-Tetrahydroxystilbene-2-O-glucoside	Others	Stilbene	-	B	1696100	1944900	1499400	0.00221125
mws0264	341.11	119	342.116	C12H22O11	[M-H]-	D-Trehalose	Others	Others	99-20-7	A	1185400	1160700	1075900	0.00147167
Hmpp004047	339.12	177.05	338.115	C20H18O5	[M+H]+	Demethoxycurcumin	Others	Others	22608-11-3	B	837480	818550	867490	0.00108518
pmn001380	187.1	169.09	188.105	C9H16O4	[M-H]-	Eucommiol	Others	Others	55930-44-4	A	791680	800830	771370	0.00101662
Hmjp003854	311.13	107.04	310.12	C19H18O4	[M+H]+	Dihydrodidemethoxy curcumin	Others	Others	-	B	764430	719570	730830	0.000952429
pme2596	184.06	148	183.053	C8H9NO4	[M+H]+	4-Pyridoxic acid	Others	Others	82-82-6	A	748600	746930	704320	0.000946076
mws1090	259.02	97	260.03	C6H13O9P	[M-H]-	Glucose-1-phosphate	Others	Others	59-56-3	A	444960	424780	465580	0.0005742
pme0534	195.05	74.9	196.058	C6H12O7	[M-H]-	Gluconic acid	Others	Others	526-95-4	A	404650	435100	432780	0.000547287
Hmcn002352	361.17	343.15	362.175	C20H26O6	[M-H]-	Ailantinol F	Others	Others	-	B	289410	310550	271160	0.000374679
Zmtn001661	315.11	153.02	316.116	C14H20O8	[M-H]-	Vanilloloside	Others	Others	74950-96-2	B	220650	253900	308970	0.000336947
Cmsp006710	275.13	137.06	274.12	C16H18O4	[M+H]+	3',4-Dihydroxy-3,5'-dimethoxybibenzyl	Others	Stilbene	83088-28-2	B	204670	221800	243290	0.000288032
Hmyp008444	311.16	145.06	310.156	C20H22O3	[M+H]+	Yakuchinone B	Others	Others	81840-57-5	B	195770	194490	197040	0.000252565
Hmpn004116	385.17	205.08	386.173	C22H26O6	[M-H]-	Gingerenone B	Others	Others	128700-98-1	B	173360	167360	172170	0.000220558
mws1333	341.11	113	342.116	C12H22O11	[M-H]-	Melibiose	Others	Others	585-99-9	A	143050	154910	145130	0.000190571
pmn001472	567.14	315	568.143	C25H28O15	[M-H]-	Polygalaxanthone III	Others	Xanthone	162857-78-5	B	160150	142340	135820	0.00018848
Cmyp007180	181.12	107.09	180.115	C11H16O2	[M+H]+	Dihydroactinidiolide	Others	Others	17092-92-1	B	89865	106040	99188	0.000126928
mws1567	307.1	119.05	308.105	C19H16O4	[M-H]-	Didemethoxycurcumin	Others	Others	33171-05-0	B	86083	87095	89111	0.000112797
ML10197929	130.09	88.04	131.069	C4H9N3O2	[M-H]-	Creatine	Others	Others	57-00-1	B	76597	72404	80938	9.8874e-05
pmp001233	191.11	91.1	190.099	C12H14O2	[M+H]+	Butylphthalide	Others	Others	6066-49-5	B	64391	72695	60024	8.47861e-05
HJN010	597.22	387.14	598.226	C28H38O14	[M-H]-	Ligraminol B	Others	Others	1335126-25-4	B	58137	43044	58003	6.84287e-05
Hmyp010491	313.18	137.06	312.172	C20H24O3	[M+H]+	Yakuchinone A	Others	Others	78954-23-1	B	52587	40418	60364	6.59274e-05
Lmbp007051	313.11	137.06	312.1	C18H16O5	[M+H]+	6-Hydroxy-2-[2-(3'-methoxy-4'-hydroxyphenylethyl)]chromone	Others	Others	-	B	41557	35247	39093	4.98315e-05
Hmyn002232	329.11	165.05	330.114	C18H18O6	[M-H]-	Ficusal	Others	Others	-	B	27881	29470	33546	3.90888e-05
Hmbp002333	387.13	147.04	386.121	C17H22O10	[M+H]+	10-Dehydrogeniposide	Others	Others	-	B	29908	21376	30504	3.51564e-05
Zmlp004119	175.04	91.06	174.032	C10H6O3	[M+H]+	Lawsone	Others	Others	83-72-7	B	28171	27048	24727	3.43813e-05
mws1038	277.12	146	278.13	C11H22N2O4S	[M-H]-	Pantetheine	Others	Others	496-65-1	B	16813	19171	24982	2.62165e-05
Hmpn002587	437.13	219.1	438.134	C21H26O8S	[M-H]-	1,7-Bis(4-hydroxy-3-methoxyphenyl)-5-oxoheptane-3-sulfonic acid	Others	Others	-	B	19047	19160	17987	2.41673e-05
Zmgp003492	373.12	105.03	372.121	C20H20O7	[M+H]+	8-Hydroxy-α-conidendrin	Others	Others	-	B	19612	17183	14735	2.21597e-05
Hmdn006855	455.35	455.35	456.361	C30H48O3	[M-H]-	3,4-Cycloopen-cycloaltin-4(29),25-diene-24(R)-hydroxy-3-carboxylic acid	Others	Others	-	B	17344	15878	17012	2.16006e-05
Hmyn000254	297.12	59.01	298.12	C18H18O4	[M-H]-	Tababiphenyl C	Others	Others	1644433-50-0	B	10749	14666	14622	1.72223e-05
Lmxn008846	197.12	153.13	198.126	C11H18O3	[M-H]-	Hydroxydihydrobovolide	Others	Others	6067-11-4	A	6016.2	4259.6	4903.7	6.5255e-06
Hmyn010272	313.18	121.03	314.188	C20H26O3	[M-H]-	Oxyphyllacinol	Others	Others	-	B	1820.3	2656.6	2160.1	2.85555e-06
mws1611	191.11	117.07	190.099	C12H14O2	[M+H]+	Z-Ligustilide	Others	Others	4431-01-0	B	9	9	9	1.16113e-08
Hmyp002315	303.04	257.04	302.042	C15H10O7	[M+H]+	3,5,7,4'-Tetrahydroxy-Coumaronochromone	Others	Others	-	B	9	9	9	1.16113e-08
Hmpp004123	399.14	177.05	398.137	C22H22O7	[M+H]+	5'-Methoxycurcumin	Others	Others	-	B	9	9	9	1.16113e-08
Hmpn002195	409.09	327.12	410.104	C19H22O8S	[M-H]-	1,7-Bis(3,4-dihydroxyphenyl)-5-oxoheptane-3-sulfonic acid	Others	Others	-	B	9	9	9	1.16113e-08
